# Supplementary material for: Healthcare-related carbon footprinting—lower impact of a coronary stenting compared to a coronary surgery pathway
Source: Front Public Health. 2024 Aug 21;12:1386826. doi: 10.3389/fpubh.2024.1386826 (PMC11371610; doi:10.3389/fpubh.2024.1386826)
Supplement: Supplementary file 1 [file Table_1.pdf]

## Supplementary information

### 1 1284 IOPC sectors and carbon intensities

| IOPC (1284) | Sector name                                                                 | Aggregated Sector               | Intensity (kg/\$) |
|-------------|-----------------------------------------------------------------------------|---------------------------------|-------------------|
| 1110010     | Plants grown undercover                                                     | Agriculture, Forestry & Fishing | 0.3901284         |
| 1120010     | Plants grown outdoors                                                       | Agriculture, Forestry & Fishing | 0.410664          |
| 1130010     | Turf                                                                        | Agriculture, Forestry & Fishing | 0.3973987         |
| 1140010     | Flowers (incl cut flowers) and flower seeds grown undercover                | Agriculture, Forestry & Fishing | 0.4169675         |
| 1150010     | Flowers (incl cut flowers) and flower seeds grown outdoors                  | Agriculture, Forestry & Fishing | 0.4351641         |
| 1210010     | Mushrooms, fresh or chilled                                                 | Agriculture, Forestry & Fishing | 0.4570168         |
| 1210020     | Mushroom spawn                                                              | Agriculture, Forestry & Fishing | 0.4371638         |
| 1220010     | Lettuces grown undercover                                                   | Agriculture, Forestry & Fishing | 0.4240577         |
| 1220020     | Tomatoes grown undercover                                                   | Agriculture, Forestry & Fishing | 0.436399          |
| 1220030     | Other vegetables, fresh or chilled, grown undercover                        | Agriculture, Forestry & Fishing | 1.021473          |
| 1230010     | Lettuces grown outdoors                                                     | Agriculture, Forestry & Fishing | 0.4460706         |
| 1230020     | Tomatoes grown outdoors                                                     | Agriculture, Forestry & Fishing | 0.4419184         |
| 1230030     | Potatoes, sweet potatoes and edible roots and tubers nec grown outdoors     | Agriculture, Forestry & Fishing | 0.4465518         |
| 1230040     | Beans, french and runner; peas, green or blue grown outdoors                | Agriculture, Forestry & Fishing | 0.4486977         |
| 1230050     | Cabbages, brussels sprouts, cauliflowers and headed broccoli grown outdoors | Agriculture, Forestry & Fishing | 0.4579606         |
| 1230060     | Carrots grown outdoors                                                      | Agriculture, Forestry & Fishing | 0.5198726         |
| 1230070     | Onions grown outdoors                                                       | Agriculture, Forestry & Fishing | 0.4863641         |
| 1230080     | Vegetable seeds                                                             | Agriculture, Forestry & Fishing | 0.4771636         |
| 1230090     | Other vegetables (incl. melons), fresh or chilled grown outdoors            | Agriculture, Forestry & Fishing | 0.4874517         |
| 1310010     | Grapes - table                                                              | Agriculture, Forestry & Fishing | 1.907568          |
| 1310020     | Grapes - wine                                                               | Agriculture, Forestry & Fishing | 0.3403186         |
| 1310030     | Grapes sun-dried or for drying                                              | Agriculture, Forestry & Fishing | 0.4680143         |
| 1320010     | Kiwi fruit                                                                  | Agriculture, Forestry & Fishing | 0.4284148         |
| 1330010     | Strawberries                                                                | Agriculture, Forestry & Fishing | 0.4797627         |
| 1330020     | Berries nec - fresh and sun-dried                                           | Agriculture, Forestry & Fishing | 0.4171722         |

| <b>IOPC<br/>(1284)</b> | <b>Sector name</b>                                                         | <b>Aggregated Sector</b>        | <b>Intensity (kg/\$)</b> |
|------------------------|----------------------------------------------------------------------------|---------------------------------|--------------------------|
| 1340010                | Apples - fresh and sun-dried                                               | Agriculture, Forestry & Fishing | 0.4582002                |
| 1340020                | Pears and quinces - fresh and sun-dried                                    | Agriculture, Forestry & Fishing | 0.457883                 |
| 1350010                | Stone fruit - fresh and sun-dried                                          | Agriculture, Forestry & Fishing | 0.50804                  |
| 1360010                | Citrus fruit - fresh and sun-dried                                         | Agriculture, Forestry & Fishing | 0.6859533                |
| 1370010                | Olives - fresh and sun-dried                                               | Agriculture, Forestry & Fishing | 0.3907203                |
| 1390010                | Bananas - fresh and sun-dried                                              | Agriculture, Forestry & Fishing | 0.4545869                |
| 1390020                | Orchard fruit nec - fresh and sun-dried                                    | Agriculture, Forestry & Fishing | 0.4789472                |
| 1390030                | Almonds and macadamias                                                     | Agriculture, Forestry & Fishing | 0.9426503                |
| 1390040                | Edible nuts (excluding Peanuts) nec; Other fruit nec - fresh and sun-dried | Agriculture, Forestry & Fishing | 0.6674384                |
| 1400010                | Sheep and lambs                                                            | Agriculture, Forestry & Fishing | 2.026744                 |
| 1400020                | Wool (shorn and dead)                                                      | Agriculture, Forestry & Fishing | 6.433502                 |
| 1400030                | Sheep and lamb products nec                                                | Agriculture, Forestry & Fishing | 1.876864                 |
| 1400040                | Sheep and beef cattle agistment services                                   | Agriculture, Forestry & Fishing | 1.937413                 |
| 1400050                | Beef cattle and calves                                                     | Agriculture, Forestry & Fishing | 2.1465                   |
| 1400060                | Beef cattle and calves products (excluding Milk) nec                       | Agriculture, Forestry & Fishing | 1.987882                 |
| 1400070                | Rice, in the husk                                                          | Agriculture, Forestry & Fishing | 1.687729                 |
| 1400080                | Wheat (incl spelt) and meslin, unmilled                                    | Agriculture, Forestry & Fishing | 3.897544                 |
| 1400090                | Barley, unmilled                                                           | Agriculture, Forestry & Fishing | 2.712664                 |
| 1400100                | Oats, unmilled                                                             | Agriculture, Forestry & Fishing | 2.286669                 |
| 1400110                | Grain, sorghum                                                             | Agriculture, Forestry & Fishing | 2.035278                 |
| 1400120                | Lupins (white or yellow) for grain                                         | Agriculture, Forestry & Fishing | 11.61807                 |
| 1400130                | Oilseeds                                                                   | Agriculture, Forestry & Fishing | 11.65062                 |
| 1400140                | Legumes for grain nec                                                      | Agriculture, Forestry & Fishing | 1.745402                 |
| 1400150                | Cereal grains nec                                                          | Agriculture, Forestry & Fishing | 1.954365                 |
| 1510010                | Sugar cane (for planting or crushing)                                      | Agriculture, Forestry & Fishing | 0.416368                 |
| 1520010                | Cotton (excl ginned)                                                       | Agriculture, Forestry & Fishing | 0.2612115                |
| 1590010                | Forage sorghum                                                             | Agriculture, Forestry & Fishing | 0.4623157                |
| 1590020                | Forage products nec                                                        | Agriculture, Forestry & Fishing | 0.7377239                |
| 1590030                | Tobacco                                                                    | Agriculture, Forestry & Fishing | 122.8439                 |
| 1590040                | Beverage and spice crops                                                   | Agriculture, Forestry & Fishing | 0.6068344                |
| 1590050                | Grass, lucerne and clover seed                                             | Agriculture, Forestry & Fishing | 0.5022574                |
| 1590060                | Hay, cereal grasses and fodder                                             | Agriculture, Forestry & Fishing | 0.4562136                |
| 1590090                | Peanuts                                                                    | Agriculture, Forestry & Fishing | 0.5089062                |
| 1590110                | Natural rubber                                                             | Agriculture, Forestry & Fishing | 0.5509912                |
| 1590120                | Crops nec                                                                  | Agriculture, Forestry & Fishing | 0.4017543                |

| <b>IOPC<br/>(1284)</b> | <b>Sector name</b>                                                                   | <b>Aggregated Sector</b>        | <b>Intensity (kg/\$)</b> |
|------------------------|--------------------------------------------------------------------------------------|---------------------------------|--------------------------|
| 1600010                | Whole milk, chilled but otherwise untreated                                          | Agriculture, Forestry & Fishing | 1.789863                 |
| 1600020                | Dairy cattle                                                                         | Agriculture, Forestry & Fishing | 3.111693                 |
| 1710010                | Poultry, for slaughtering                                                            | Agriculture, Forestry & Fishing | 0.589391                 |
| 1720010                | Eggs                                                                                 | Agriculture, Forestry & Fishing | 0.6477271                |
| 1720020                | Egg laying hens                                                                      | Agriculture, Forestry & Fishing | 0.6081401                |
| 1800010                | Deer                                                                                 | Agriculture, Forestry & Fishing | 0.5947686                |
| 1910010                | Thoroughbred horses                                                                  | Agriculture, Forestry & Fishing | 0.6543348                |
| 1910020                | Horse stud and breeding services; horses nec                                         | Agriculture, Forestry & Fishing | 0.6483563                |
| 1910030                | Horse Agistment Services                                                             | Agriculture, Forestry & Fishing | 0.6795418                |
| 1920010                | Pigs                                                                                 | Agriculture, Forestry & Fishing | 0.5995645                |
| 1930010                | Unblended honey and beeswax                                                          | Agriculture, Forestry & Fishing | 0.8503454                |
| 1990010                | Pet breeding and live animals nec                                                    | Agriculture, Forestry & Fishing | 0.6505253                |
| 1990020                | Livestock products nec                                                               | Agriculture, Forestry & Fishing | 0.6090375                |
| 2000010                | Farmed oysters (including Pearl), paua and molluscs nec                              | Agriculture, Forestry & Fishing | 0.2671303                |
| 2000020                | Farmed seaweed                                                                       | Agriculture, Forestry & Fishing | 0.2454433                |
| 2000030                | Farmed fish and fish hatchery products                                               | Agriculture, Forestry & Fishing | 0.268509                 |
| 2000040                | Farmed prawns and crustaceans nec                                                    | Agriculture, Forestry & Fishing | 0.2520298                |
| 2031980                | General government consumption of fixed capital (0201-0203)                          | Other                           | 122.9487                 |
| 3010010                | Natural gums and resins (incl oleoresins)                                            | Agriculture, Forestry & Fishing | 0.2344844                |
| 3010020                | Softwoods (conifers) growing                                                         | Agriculture, Forestry & Fishing | 0.2455384                |
| 3010030                | Hardwoods, brushwoods, scrubwoods - growing                                          | Agriculture, Forestry & Fishing | 0.2653103                |
| 3010040                | Forest products nec                                                                  | Agriculture, Forestry & Fishing | 0.2346497                |
| 3020010                | Softwoods (conifers) logs                                                            | Agriculture, Forestry & Fishing | 0.2732087                |
| 3020020                | Hardwoods, brushwoods, scrubwoods - logs; hewn timber and timber nec (incl firewood) | Agriculture, Forestry & Fishing | 0.2347411                |
| 3021980                | General government consumption of fixed capital (0301-0302)                          | Other                           | 0.2313026                |
| 4110010                | Rock lobster and crab                                                                | Agriculture, Forestry & Fishing | 0.5054359                |
| 4120010                | Prawns                                                                               | Agriculture, Forestry & Fishing | 0.2427374                |
| 4130010                | Fish and squid (line fishing)                                                        | Agriculture, Forestry & Fishing | 0.2988348                |
| 4140010                | Fish (trawling or netting)                                                           | Agriculture, Forestry & Fishing | 0.263293                 |
| 4190010                | Oysters and other aquatic invertebrates nec, live, fresh or chilled                  | Agriculture, Forestry & Fishing | 0.2753429                |
| 4190020                | Coral and similar, shells of molluscs; natural animal sponges; algae, fresh or dried | Agriculture, Forestry & Fishing | 0.4493611                |

| <b>IOPC<br/>(1284)</b> | <b>Sector name</b>                                                                                        | <b>Aggregated Sector</b>        | <b>Intensity (kg/\$)</b> |
|------------------------|-----------------------------------------------------------------------------------------------------------|---------------------------------|--------------------------|
| 4190030                | Freshwater fish and aquatic animals nec                                                                   | Agriculture, Forestry & Fishing | 0.2412683                |
| 4200010                | Skins and pieces, raw                                                                                     | Agriculture, Forestry & Fishing | 0.2418808                |
| 4200020                | Wildlife culling services                                                                                 | Services                        | 0.2274861                |
| 4200030                | Hunting and trapping products nec                                                                         | Agriculture, Forestry & Fishing | 0.2012673                |
| 4201980                | General government consumption of fixed capital (0411-0420)                                               | Other                           | 0.2277452                |
| 5100010                | Services to forestry nec                                                                                  | Services                        | 0.2914667                |
| 5210010                | Cotton (ginned), cotton seed, waste from cotton and cotton ginning services                               | Agriculture, Forestry & Fishing | 3.727919                 |
| 5220010                | Sheep shearing services                                                                                   | Services                        | 0.2964324                |
| 5290010                | Aerial agricultural services                                                                              | Services                        | 0.2968032                |
| 5290020                | Services to agriculture nec                                                                               | Services                        | 0.2969624                |
| 5290030                | Services to fishing nec                                                                                   | Services                        | 0.2933171                |
| 5290040                | Wool classing services                                                                                    | Services                        | 0.2988395                |
| 5291980                | General government consumption of fixed capital (0510-0529)                                               | Other                           | 0.2979079                |
| 6000010                | Black coal (all types incl briquettes)                                                                    | Mining                          | 9.893492                 |
| 6000020                | Brown coal-lignite (incl briquettes)                                                                      | Mining                          | 0.7789122                |
| 7000010                | Crude oil (incl. condensate)                                                                              | Mining                          | 0.868584                 |
| 7000020                | Liquefied natural gas                                                                                     | Mining                          | 9.753042                 |
| 7000030                | Natural gas (in the gaseous state)                                                                        | Mining                          | 0.3703906                |
| 7000040                | Coal gas, water gas, producer gas and similar gases (excl petroleum gases and other gaseous hydrocarbons) | Mining                          | 0.4693589                |
| 8010010                | Iron ore (incl treatment; excl pelletising)                                                               | Mining                          | 10.83925                 |
| 8010020                | Agglomerated iron ores nec (incl iron ore pellets and sintered ores)                                      | Mining                          | 0.6257947                |
| 8020010                | Bauxite                                                                                                   | Mining                          | 0.6485976                |
| 8030010                | Copper concentrates, oxides and ores                                                                      | Mining                          | 1.164804                 |
| 8040010                | Gold bullion and ores                                                                                     | Mining                          | 0.4748452                |
| 8050010                | Beneficiated ilmenite, ilmenite and leucoxene concentrates                                                | Mining                          | 0.5366743                |
| 8050020                | Rutile concentrates                                                                                       | Mining                          | 2.596654                 |
| 8050030                | Monazite, xenotime and zircon concentrates; mineral sand ores nec                                         | Mining                          | 3.015339                 |
| 8060010                | Nickel ores and concentrates                                                                              | Mining                          | 0.5418418                |

| <b>IOPC<br/>(1284)</b> | <b>Sector name</b>                                                                                                           | <b>Aggregated Sector</b> | <b>Intensity (kg/\$)</b> |
|------------------------|------------------------------------------------------------------------------------------------------------------------------|--------------------------|--------------------------|
| 8070010                | Lead ores and concentrates (excl silver-lead-zinc ores)                                                                      | Mining                   | 1.02861                  |
| 8070020                | Silver and zinc ores                                                                                                         | Mining                   | 0.7408254                |
| 8090010                | Tin, tin-copper and tin-tantalite concentrates                                                                               | Mining                   | 0.7010189                |
| 8090020                | Uranium concentrates                                                                                                         | Mining                   | 16.40061                 |
| 8090030                | Manganese ores                                                                                                               | Mining                   | 1.431123                 |
| 8090040                | Non-ferrous metallic ores and concentrates nec (incl tungsten)                                                               | Mining                   | 7.660237                 |
| 9110010                | Gravel                                                                                                                       | Mining                   | 0.7129824                |
| 9110020                | Sand                                                                                                                         | Mining                   | 0.7070185                |
| 9190010                | Dimension stone                                                                                                              | Mining                   | 0.8755783                |
| 9190020                | Pebbles, broken or crushed stone, macadam, tarred macadam, granules, chippings and powder of stone                           | Mining                   | 0.6484082                |
| 9190030                | Limestone (incl shell and coral)                                                                                             | Mining                   | 0.7099018                |
| 9190040                | Clays nec (incl brick, pipe, tile and shale)                                                                                 | Mining                   | 0.7260531                |
| 9190050                | Construction materials (mined) nec (incl decomposed rock, residues, etc) (excl crushed and broken stone and dimension stone) | Mining                   | 3.16682                  |
| 9900010                | Salt                                                                                                                         | Mining                   | 0.6981029                |
| 9900020                | Precious and semi-precious gemstones (incl garnet concentrate)                                                               | Mining                   | 1.175635                 |
| 9900030                | Gypsum; anhydrite; calcareous stone of a kind used for the manufacture of lime or cement (excluding limestone)               | Mining                   | 0.9820558                |
| 9900040                | Silica                                                                                                                       | Mining                   | 2.071525                 |
| 9900050                | Natural phosphates and Phosphate rock (unground)                                                                             | Mining                   | 0.7054765                |
| 9900060                | Chemical and fertilizer minerals nec                                                                                         | Mining                   | 0.6846127                |
| 9900070                | Non-metallic minerals nec                                                                                                    | Mining                   | 8.659008                 |
| 10110010               | Petroleum exploration                                                                                                        | Mining                   | 0.532463                 |
| 10120010               | Mineral exploration                                                                                                          | Mining                   | 0.502412                 |
| 10900010               | Mining services nec                                                                                                          | Services                 | 0.5038031                |
| 10901980               | General government consumption of fixed capital (1011-1090)                                                                  | Other                    | 0.4995795                |
| 11110010               | Fresh meat, chilled or frozen (excl kangaroo or horse meat, other than for human consumption)                                | Other                    | 4.838681                 |

| <b>IOPC<br/>(1284)</b> | <b>Sector name</b>                                                                                                  | <b>Aggregated Sector</b>        | <b>Intensity (kg/\$)</b> |
|------------------------|---------------------------------------------------------------------------------------------------------------------|---------------------------------|--------------------------|
| 11110020               | Fresh kangaroo or horse meat, other than for human consumption                                                      | Other                           | 1.647148                 |
| 11110030               | Casings, bungs, weasands and runners (incl gut materials for further processing)                                    | Agriculture, Forestry & Fishing | 3.271276                 |
| 11110040               | Edible offals (excl poultry offals)                                                                                 | Other                           | 6.791529                 |
| 11110050               | Edible tallow (excl refined)                                                                                        | Other                           | 1.473327                 |
| 11110060               | Inedible tallow (excl refined) and other unrefined animal oils and fats                                             | Agriculture, Forestry & Fishing | 108.3703                 |
| 11110070               | Raw hides and skins                                                                                                 | Agriculture, Forestry & Fishing | 1.388199                 |
| 11110080               | Meat (excl fresh) for human consumption                                                                             | Other                           | 1.424852                 |
| 11110090               | Blood meal (milled or screened dried blood) for use as stock or poultry feed                                        | Agriculture, Forestry & Fishing | 1.370204                 |
| 11110100               | Inedible meat or meat offal flours, meals and pellets; greaves                                                      | Agriculture, Forestry & Fishing | 5.143923                 |
| 11110110               | Other animal products nec                                                                                           | Agriculture, Forestry & Fishing | 4.346483                 |
| 11120010               | Poultry and poultry products (incl canned)                                                                          | Other                           | 1.334934                 |
| 11130010               | Bacon and ham and other dried, salted or smoked pigmeat (incl canned)                                               | Other                           | 1.221354                 |
| 11130020               | Smallgoods nec (incl crumbed lamb cutlets, cured meat (canned or uncanned), frankfurters, saveloys and salami)      | Other                           | 1.357102                 |
| 11131700               | Meat and meat products - commission production (1111-1113)                                                          | Other                           | 1.391464                 |
| 11200010               | Fish, canned                                                                                                        | Other                           | 0.14831                  |
| 11200020               | Frozen whole fish, fish fillets and fish meat; fish loaf, cake, balls and paste; smoked fish; fish fingers; caviar  | Other                           | 0.1543655                |
| 11200030               | Rock lobster and crayfish (incl tails), chilled or frozen (incl boiled and frozen)                                  | Other                           | 0.1960501                |
| 11200040               | Crustaceans, molluscs & aquatic invertebrates nec (chilled, frozen, preserved or otherwise prepared)                | Other                           | 0.1656484                |
| 11200050               | Inedible flours, meals, pellets & other products nec of fish, crustaceans & molluscs or other aquatic invertebrates | Other                           | 0.133173                 |
| 11201700               | Processed seafood - commission production                                                                           | Other                           | 0.1314251                |

| <b>IOPC<br/>(1284)</b> | <b>Sector name</b>                                                                                              | <b>Aggregated Sector</b> | <b>Intensity (kg/\$)</b> |
|------------------------|-----------------------------------------------------------------------------------------------------------------|--------------------------|--------------------------|
| 11201980               | General government consumption of fixed capital (1120)                                                          | Other                    | 122.9965                 |
| 11310010               | Processed liquid milk (incl whole milk and skim)                                                                | Other                    | 1.39372                  |
| 11310020               | Cream (incl thickened), not concentrated or sweetened                                                           | Other                    | 1.322952                 |
| 11320010               | Ice cream and frozen confections                                                                                | Other                    | 1.246266                 |
| 11330010               | Flavoured whole milk drinks                                                                                     | Other                    | 1.241058                 |
| 11330020               | Sour cream, yoghurt and other cultured milk products                                                            | Other                    | 1.180045                 |
| 11330030               | Buttermilk                                                                                                      | Other                    | 1.353158                 |
| 11330040               | Fats and oils derived from milk (incl butter oil); casein                                                       | Other                    | 1.153905                 |
| 11330050               | Butter                                                                                                          | Other                    | 1.194225                 |
| 11330060               | Cheese and curd                                                                                                 | Other                    | 1.564086                 |
| 11330070               | Milk based food preparations (excluding malt extracts) and dried milk based mixes                               | Other                    | 1.384503                 |
| 11330080               | Milk and cream, concentrated or sweetened; lactose and lactose syrup; products of natural milk constituents nec | Other                    | 1.457003                 |
| 11331700               | Dairy products - commission production (1131-1133)                                                              | Other                    | 1.019078                 |
| 11400010               | Jams                                                                                                            | Other                    | 0.4492579                |
| 11400020               | Fruit juices, single strength or concentrated                                                                   | Other                    | 0.414691                 |
| 11400030               | Dried fruit (excl sun-dried)                                                                                    | Other                    | 0.4747244                |
| 11400040               | Preserved fruit and fruit products nec                                                                          | Other                    | 0.5167241                |
| 11400050               | Vegetables, frozen                                                                                              | Other                    | 0.4197549                |
| 11400060               | Vegetables, prepared or preserved (incl dried or shelled)(excl frozen); pickles and chutney                     | Other                    | 1.196431                 |
| 11400070               | Tomato pulp, puree and paste                                                                                    | Other                    | 0.4619373                |
| 11400080               | Mixed meat and vegetables, canned                                                                               | Other                    | 0.4831924                |
| 11400090               | Vegetable juices (incl mixtures)(incl tomato); mixtures of vegetable and fruit juices                           | Other                    | 0.3736406                |
| 11400100               | Pasta products, canned                                                                                          | Other                    | 0.4132561                |
| 11400110               | Soup and homogenised food preparations including fruit, vegetables, meat or composites thereof                  | Other                    | 0.6080195                |
| 11400120               | Sauces (excl worcestershire and apple); vinegar (excl wine vinegar)                                             | Other                    | 0.5155304                |

| <b>IOPC<br/>(1284)</b> | <b>Sector name</b>                                                                                                               | <b>Aggregated Sector</b> | <b>Intensity (kg/\$)</b> |
|------------------------|----------------------------------------------------------------------------------------------------------------------------------|--------------------------|--------------------------|
| 11400130               | Fresh vegetable salads, in plastic containers                                                                                    | Other                    | 0.4808912                |
| 11400140               | Fruit and vegetable based health, invalid or baby preparations                                                                   | Other                    | 0.5951124                |
| 11400150               | Dried roots, tubers and vegetables; Flour and meal of vegetables nec.                                                            | Other                    | 0.3559638                |
| 11401700               | Fruit and vegetable products - commission production                                                                             | Other                    | 0.3517551                |
| 11500010               | Crude soya bean, cotton seed, peanut, sunflower, safflower, rape seed, coconut and vegetable oils                                | Other                    | 1.196253                 |
| 11500020               | Refined and processed animal or vegetable oils and fats (incl tallow) (excl neatsfoot, wool grease and lanolin)                  | Other                    | 1.453684                 |
| 11500030               | Margarine                                                                                                                        | Other                    | 1.243805                 |
| 11500040               | Oil-cake, acid oils, cotton linters and other solid residues resulting from the extraction or refining of vegetable fats or oils | Other                    | 1.106704                 |
| 11501700               | Oils and fats - commission production                                                                                            | Other                    | 0.9736387                |
| 11610010               | Wheat and other cereal flours (incl self-raising)                                                                                | Other                    | 1.261723                 |
| 11610020               | Flour mill products nec, for human consumption                                                                                   | Other                    | 1.428673                 |
| 11610030               | Wheat bran for human consumption (excl for breakfast food)                                                                       | Other                    | 1.85932                  |
| 11610040               | Starch of wheat and corn                                                                                                         | Other                    | 1.655474                 |
| 11610050               | Glucose, glucose syrup (incl dextrose) and modified starches (incl dextrans)                                                     | Other                    | 1.273517                 |
| 11610060               | Wheat gluten and tapioca                                                                                                         | Other                    | 2.01079                  |
| 11610070               | Prepared baking powders                                                                                                          | Other                    | 1.313652                 |
| 11610080               | Malt (excl malt extract)                                                                                                         | Other                    | 8.131379                 |
| 11610090               | Malt extract                                                                                                                     | Other                    | 2.375092                 |
| 11610100               | Rice (husked, semi-milled or wholly milled)                                                                                      | Other                    | 1.775738                 |
| 11610110               | Rice groats, meals and pellets; other worked cereal grains and products nec;                                                     | Other                    | 1.80509                  |
| 11620010               | Cereal foods (incl breakfast foods)                                                                                              | Other                    | 1.744238                 |
| 11620020               | Mixes and doughs nec (incl custard powder) for preparation of bakers wares (excl frozen)                                         | Other                    | 1.292491                 |
| 11620030               | Pasta                                                                                                                            | Other                    | 2.399801                 |
| 11621700               | Grain mill and cereal products - commission production (1161-1162)                                                               | Other                    | 131.7251                 |

| <b>IOPC<br/>(1284)</b> | <b>Sector name</b>                                                                            | <b>Aggregated Sector</b> | <b>Intensity (kg/\$)</b> |
|------------------------|-----------------------------------------------------------------------------------------------|--------------------------|--------------------------|
| 11700010               | Bread and bread rolls                                                                         | Other                    | 0.8920372                |
| 11700020               | Biscuits and biscuit crumbs; rusks; ice cream cones and wafers; unleavened bread              | Other                    | 0.9278626                |
| 11700030               | Cakes, pastries and crumpets                                                                  | Other                    | 0.9104199                |
| 11700040               | Meat pies                                                                                     | Other                    | 0.8227862                |
| 11700050               | Biscuit and bread dough (incl frozen)                                                         | Other                    | 1.273949                 |
| 11701700               | Bakery products - commission production (1171-1174)                                           | Other                    | 0.7552349                |
| 11810010               | Raw and refined sugar in solid form (incl brown sugar)(excl icing sugar)                      | Other                    | 1.516723                 |
| 11810020               | Icing sugar, molasses (incl treacle) and sugar nec                                            | Other                    | 0.9019256                |
| 11810030               | Liquid refined sugar, golden syrup, artificial honey, starch and sugar products nec           | Other                    | 1.109849                 |
| 11820010               | Chocolate confectionery (excl chocolate coated biscuits and white chocolate)                  | Other                    | 1.024984                 |
| 11820020               | Cocoa beans (roasted); cocoa paste, powder, butter, fat or oil                                | Other                    | 0.8524495                |
| 11820030               | Other food preparations containing cocoa (excl chocolate confectionery)                       | Other                    | 1.179218                 |
| 11820040               | Chewing gum, white chocolate and other confectionery not containing cocoa                     | Other                    | 1.058533                 |
| 11820050               | Crystallised, drained and glace fruit, nuts and peel                                          | Other                    | 1.000841                 |
| 11821700               | Sugar and confectionery - commission production (1181-1182)                                   | Other                    | 0.3707072                |
| 11910010               | Potato crisps and flakes                                                                      | Other                    | 0.6212181                |
| 11910020               | Corn chips; taco, tortilla and tostada shells                                                 | Other                    | 0.6163552                |
| 11920010               | Dog and cat food (excl canned)                                                                | Other                    | 0.6462268                |
| 11920020               | Dog and cat food, canned                                                                      | Other                    | 0.6536432                |
| 11920030               | Bran, sharps and other residues (excl rice, wheat and rye), for animal feed                   | Other                    | 0.5190605                |
| 11920040               | Prepared animal and bird feeds nec (incl poultry pellets, crumbles and mash)                  | Other                    | 0.5391944                |
| 11920050               | Cereal groats, meals, pellets and other cereal products nec, other than for human consumption | Other                    | 0.5847201                |
| 11990010               | Coffee and tea, including substitutes                                                         | Other                    | 0.6019181                |
| 11990020               | Yeast and yeast extracts                                                                      | Other                    | 0.5936108                |
| 11990030               | Nuts, roasted                                                                                 | Other                    | 0.6718178                |

| <b>IOPC<br/>(1284)</b> | <b>Sector name</b>                                                                                                    | <b>Aggregated Sector</b> | <b>Intensity (kg/\$)</b> |
|------------------------|-----------------------------------------------------------------------------------------------------------------------|--------------------------|--------------------------|
| 11990040               | Spices                                                                                                                | Other                    | 0.6401134                |
| 11990050               | Mustard; worcestershire sauce; mayonnaise and salad dressing                                                          | Other                    | 0.7651941                |
| 11990060               | Flavouring essences, industrial                                                                                       | Other                    | 0.527869                 |
| 11990070               | Prepared meals (incl TV dinners), of meat or meat offal                                                               | Other                    | 0.6770266                |
| 11990080               | Bakers' wares nec (incl pretzels and frozen pizza) (excl bread and pies)                                              | Other                    | 0.6144438                |
| 11990090               | Peanut butter and other nut butters, pastes and purees; jams                                                          | Other                    | 0.1223706                |
| 11990100               | Refined salt (cooking and table)                                                                                      | Other                    | 1.975594                 |
| 11990110               | Gelatine                                                                                                              | Other                    | 0.5871884                |
| 11990120               | Food products nec (incl jelly crystals, meat pastes)                                                                  | Other                    | 0.7390473                |
| 11991700               | Other food products - commission production (1191-1199)                                                               | Other                    | 95.89498                 |
| 11991970               | Waste from the manufacture of food, food products and beverages (excl alcohol) (1111-1211)                            | Other                    | 0.5621287                |
| 11991980               | General government consumption of fixed capital (1191-1199)                                                           | Other                    | 122.9431                 |
| 12110010               | Natural and artificial mineral waters and aerated waters (excl sweetened or flavoured)                                | Other                    | 0.6503919                |
| 12110020               | Natural water nec                                                                                                     | Other                    | 0.5831343                |
| 12110030               | Mineral waters and aerated waters, sweetened or flavoured, canned                                                     | Other                    | 0.682589                 |
| 12110040               | Mineral waters and aerated waters, sweetened or flavoured, bottled                                                    | Other                    | 0.6672933                |
| 12110050               | Cordials and syrups; powder flavours for soft drinks; concentrated cordial extracts                                   | Other                    | 1.069227                 |
| 12110060               | Sweetened or flavoured bulk pre-mix & post-mix concentrates for mineral & aerated waters; non-alcoholic beverages nec | Other                    | 0.6621787                |
| 12110070               | Ice                                                                                                                   | Other                    | 0.4953911                |
| 12111700               | Soft drinks, cordials and syrups - commission production                                                              | Other                    | 0.3292891                |
| 12120010               | Beer, ale and stout, bottled                                                                                          | Other                    | 1.313045                 |
| 12120020               | Beer, ale and stout, canned                                                                                           | Other                    | 1.486557                 |
| 12120030               | Beer, ale and stout, bulk                                                                                             | Other                    | 1.275097                 |

| <b>IOPC<br/>(1284)</b> | <b>Sector name</b>                                                                                                                       | <b>Aggregated Sector</b> | <b>Intensity (kg/\$)</b> |
|------------------------|------------------------------------------------------------------------------------------------------------------------------------------|--------------------------|--------------------------|
| 12121700               | Beer - commission production                                                                                                             | Other                    | 0.3879772                |
| 12130010               | Whisky, brandy, rum, gin and fortified spirits; other distilled alcoholic beverages (incl liqueurs and mixed drinks)                     | Other                    | 0.8496925                |
| 12130020               | Vermouth and distillation wine                                                                                                           | Other                    | 0.5905488                |
| 12140010               | Wines (incl sparkling) of grapes and other fruit (excl vermouth)                                                                         | Other                    | 1.067224                 |
| 12140020               | Cider, perry, mead and wine-based mixed drinks (coolers)                                                                                 | Other                    | 0.6063171                |
| 12140030               | Vinegar from wine                                                                                                                        | Other                    | 0.4224098                |
| 12141700               | Wine, spirits and other alcoholic beverages - commission production (1213-1214)                                                          | Other                    | 0.410057                 |
| 12141970               | Waste from the manufacture of alcohol (1212-1214)                                                                                        | Other                    | 0.4033082                |
| 12200010               | Cigarettes, cigars, cheroots and tobacco                                                                                                 | Other                    | 0.4825526                |
| 12201700               | Cigarette and tobacco products - commission production                                                                                   | Other                    | 122.0516                 |
| 12201970               | Waste from the manufacture of tobacco products                                                                                           | Other                    | 122.9972                 |
| 13110010               | Wool, scoured or carbonised (degreased but not carded or combed)                                                                         | Consumable supplies      | 6.482297                 |
| 13110020               | Wool tops; noils of wool or fine animal hair                                                                                             | Consumable supplies      | 1.070402                 |
| 13110030               | Wool grease and fatty substances derived from wool grease (incl lanolin)                                                                 | Consumable supplies      | 4.453169                 |
| 13120010               | Yarn and thread (excl chenille, loop wale, elastic or elastomeric) of natural fibres (incl worsted) nec                                  | Consumable supplies      | 0.8844506                |
| 13120020               | Chenille, loop wale yarn and thread of natural fibres                                                                                    | Consumable supplies      | 0.9259749                |
| 13120030               | Natural textile fibres prepared for spinning nec                                                                                         | Consumable supplies      | 1.017802                 |
| 13120040               | Narrow woven textile fabrics (incl tape) (excl bias binding) of natural fibres; tyre cord fabric of high tenacity yarn of natural fibres | Consumable supplies      | 0.8746621                |
| 13120050               | Woven and broadwoven pile, chenille and terry fabrics of cotton or other natural fibre (excl narrow fabrics)                             | Consumable supplies      | 1.014928                 |
| 13120060               | Woven and broadwoven fabrics of natural fibres, other than cotton, nec (excl pile, chenille and terry)                                   | Consumable supplies      | 1.001949                 |

| <b>IOPC<br/>(1284)</b> | <b>Sector name</b>                                                                                                                           | <b>Aggregated Sector</b> | <b>Intensity (kg/\$)</b> |
|------------------------|----------------------------------------------------------------------------------------------------------------------------------------------|--------------------------|--------------------------|
| 13120070               | Woven and broadwoven fabrics of cotton (excl pile, chenille and terry)                                                                       | Consumable supplies      | 0.9993009                |
| 13130010               | Textured, high tenacity, single, elastomeric, synthetic or artificial yarns and threads nec                                                  | Consumable supplies      | 1.006926                 |
| 13130020               | Gimped yarn and strip; chenille and loop-wade yarn; woven or broadwoven fabrics of metal thread and metallised yarn nec                      | Consumable supplies      | 0.8494658                |
| 13130030               | Elastomeric yarn of cotton, wool or fine animal hair (containing polyurethane or similar thread, excl rubber thread)                         | Consumable supplies      | 0.5064782                |
| 13130040               | Yarn of glass fibre                                                                                                                          | Consumable supplies      | 0.01856294               |
| 13130050               | Woven or broadwoven fabric of artificial or synthetic filaments and fibres (excl pile or chenille)                                           | Consumable supplies      | 1.024858                 |
| 13130060               | Woven pile fabrics and chenille fabrics (other than narrow fabrics) of man-made fibres                                                       | Consumable supplies      | 0.8885238                |
| 13130070               | Narrow woven textile fabrics (incl tape) (excl bias binding) of synthetic fibres; tyre cord fabric of high tenacity yarn of synthetic fibres | Consumable supplies      | 1.129278                 |
| 13131700               | Textiles - commission production (1311-1313)                                                                                                 | Consumable supplies      | 0.9984096                |
| 13200010               | Leather, vegetable or chrome tanned (incl re-tanned), dressed or finished; chamois leathers                                                  | Consumable supplies      | 0.3940688                |
| 13200020               | Leather (excl dressed or finished)                                                                                                           | Consumable supplies      | 0.2927511                |
| 13200030               | Raw hides and skins, pickled or otherwise preserved                                                                                          | Consumable supplies      | 4.525011                 |
| 13200040               | Tanned or dressed skins, with hair or wool retained (incl sheepskin rugs)                                                                    | Consumable supplies      | 0.2921685                |
| 13200050               | Handbags, suitcases, bags, travel sets for personal toilet articles, purses, key cases, wallets and billfolds (excl paper)                   | Consumable supplies      | 0.2991402                |
| 13200060               | Saddlery and harness, of any material; leather articles nec                                                                                  | Consumable supplies      | 0.3265183                |
| 13200070               | Rucksacks of leather or leather substitute                                                                                                   | Consumable supplies      | 0.04218068               |
| 13201700               | Tanned leather, dressed fur and leather products - commission production                                                                     | Consumable supplies      | 0.04496321               |
| 13310010               | Carpets and other textile floor coverings (incl mats and matting) (excl felt and underfelt)                                                  | Consumable supplies      | 0.694445                 |

| <b>IOPC<br/>(1284)</b> | <b>Sector name</b>                                                                                                      | <b>Aggregated Sector</b> | <b>Intensity (kg/\$)</b> |
|------------------------|-------------------------------------------------------------------------------------------------------------------------|--------------------------|--------------------------|
| 13320010               | Rope and cable (excl wire), cordage (excl tyre cord yarn), twine or net products                                        | Consumable supplies      | 0.7148297                |
| 13330010               | Textile interior furnishing articles (incl blankets (excl electric), wall coverings, curtains, bed and table linen nec) | Consumable supplies      | 0.717183                 |
| 13330020               | Towels (incl tea towels) and face washers of cotton terry towelling or similar cotton terry fabrics                     | Consumable supplies      | 0.4313992                |
| 13330030               | Baby napkins of textile fabrics                                                                                         | Consumable supplies      | 0.6707559                |
| 13330040               | Textile quilted prods, hose/tubing, nonwovens, (bonded & yarn fabrics)                                                  | Consumable supplies      | 0.7386227                |
| 13330050               | Curtains in the piece (incl continuous), knitted or crocheted                                                           | Consumable supplies      | 0.7323185                |
| 13330060               | Textile tarpaulins (incl canvas), sails, tents, annexes, pneumatic mattresses and motor vehicle covers                  | Consumable supplies      | 0.7058543                |
| 13330070               | Blinds and awnings of textile fabrics (incl canvas) and woven textile materials (incl cotton)                           | Consumable supplies      | 0.7349985                |
| 13330080               | Bags, sacks and packets of textile or canvas                                                                            | Consumable supplies      | 0.6856373                |
| 13330090               | Textile motor vehicle seat covers                                                                                       | Consumable supplies      | 0.7358997                |
| 13330100               | Pillows, cushions, bolsters, bean bags and stuffed mattress protectors (excl those of or stuffed with rubber)           | Consumable supplies      | 0.703433                 |
| 13330110               | Floor-cloths, dishcloths, dusters and similar cleaning cloths                                                           | Consumable supplies      | 0.7011716                |
| 13330120               | Textile life jackets, life-belts, sleeping bags, parachutes and other cut and sewn textile products nec                 | Consumable supplies      | 0.8427805                |
| 13340010               | Labels and badges with printed or woven lettering or design                                                             | Consumable supplies      | 0.7058459                |
| 13340020               | Textile finishing nec                                                                                                   | Consumable supplies      | 0.7185608                |
| 13340030               | Felt floor coverings (exclude underfelt)                                                                                | Consumable supplies      | 0.7432203                |
| 13340040               | Underfelt and other felt products (excl floor coverings, headwear or clothing)                                          | Consumable supplies      | 0.727626                 |
| 13340050               | Textile fabrics (excl rubber or plastic coated) & articles (excl bags) of a kind commonly used in machinery or plant    | Consumable supplies      | 1.76806                  |

| <b>IOPC<br/>(1284)</b> | <b>Sector name</b>                                                                                                                                  | <b>Aggregated Sector</b>              | <b>Intensity (kg/\$)</b> |
|------------------------|-----------------------------------------------------------------------------------------------------------------------------------------------------|---------------------------------------|--------------------------|
| 13340060               | Wadding, powder puffs, pads, cotton wool, gauze and bandages                                                                                        | Pharmaceutical and medicinal supplies | 0.7208998                |
| 13340080               | Articles of bonded fibre or yarn fabrics (excl labels & badges); tapestries, textile sutures, transmission and conveyor belts, textile articles nec | Consumable supplies                   | 0.4659135                |
| 13340090               | Braids, tassels, tulles; lace or embroidery, strips or motifs                                                                                       | Consumable supplies                   | 0.706779                 |
| 13340100               | Special fabrics nec                                                                                                                                 | Consumable supplies                   | 0.003823358              |
| 13340110               | Garment dyeing service                                                                                                                              | Services                              | 0.5511141                |
| 13341700               | Textile products - commission production (1331-1334)                                                                                                | Consumable supplies                   | 0.658664                 |
| 13341980               | General government consumption of fixed capital (1331-1334)                                                                                         | Other                                 | 122.9802                 |
| 13400010               | Hosiery (incl pantyhose, stockings, tights and socks)                                                                                               | Consumable supplies                   | 0.05099674               |
| 13400020               | Pullovers, jumpers, sweaters and cardigans - knitted                                                                                                | Consumable supplies                   | 0.04300788               |
| 13400030               | Knitted or crocheted pile fabrics (excl elastic or elastomeric)                                                                                     | Consumable supplies                   | 0.06004652               |
| 13400040               | Knitted or crocheted fabric nec                                                                                                                     | Consumable supplies                   | 0.04125897               |
| 13400050               | Knitted products nec                                                                                                                                | Consumable supplies                   | 0.05552298               |
| 13401700               | Knitted products - commission production                                                                                                            | Consumable supplies                   | 122.995                  |
| 13510010               | Mens and boys trousers (excl suits), shorts, jeans, overalls and work shirts, dustcoats, textile (excl waterproof)                                  | Consumable supplies                   | 0.05722563               |
| 13510020               | Men's & boys' suits or uniforms (incl trousers for suits & uniforms), coats & jackets, textile (excl waterproof)                                    | Consumable supplies                   | 0.05905589               |
| 13510030               | Women's and girls' dresses, skirts, slacks, shorts, tunics, uniforms, jeans, overalls, leotards, coats, capes, suits and ensembles                  | Consumable supplies                   | 0.06054205               |
| 13510040               | Shirts and blouses (with collars)                                                                                                                   | Consumable supplies                   | 0.05736147               |
| 13510050               | T-shirts and tank tops                                                                                                                              | Consumable supplies                   | 0.05523506               |
| 13510060               | Swimwear; sweatsuits, tracksuits, jogging suits, leisure suits and jumpsuits                                                                        | Consumable supplies                   | 0.05894891               |
| 13510070               | Foundation garments (incl brassieres, corsets and girdles)                                                                                          | Consumable supplies                   | 0.05131648               |

| <b>IOPC<br/>(1284)</b> | <b>Sector name</b>                                                                                                     | <b>Aggregated Sector</b> | <b>Intensity (kg/\$)</b> |
|------------------------|------------------------------------------------------------------------------------------------------------------------|--------------------------|--------------------------|
| 13510080               | Underwear                                                                                                              | Consumable supplies      | 0.05116488               |
| 13510090               | Outer nightwear (incl dressing gowns and robes) and sleepwear                                                          | Consumable supplies      | 0.03229735               |
| 13510100               | Waterproof, plastic or rubber trousers, overalls, coats and jackets                                                    | Consumable supplies      | 0.0561907                |
| 13510110               | Plastic (unsupported film) clothing other than waterproof                                                              | Consumable supplies      | 0.04699181               |
| 13510120               | Wetsuits and other rubber clothing and accessories nec (incl gloves, belts)(excl headgear)                             | Consumable supplies      | 0.04897114               |
| 13510130               | Fur and sheepskin clothing and clothing accessories (excl headwear, footwear, handbags, purses and toys)               | Consumable supplies      | 0.06699513               |
| 13510140               | Hats and other headgear (excl safety, rubber or plastic)                                                               | Consumable supplies      | 0.04352934               |
| 13510150               | Safety headgear; textile belts for clothing; plastic clothing accessories (excl belts and disposable gloves)           | Consumable supplies      | 0.04250549               |
| 13510160               | Safety eyewear (industrial or sporting)(incl goggles)                                                                  | Consumable supplies      | 0.04845869               |
| 13510170               | Clothing and clothing accessories nec                                                                                  | Consumable supplies      | 0.05107259               |
| 13511700               | Clothing - commission production                                                                                       | Consumable supplies      | 0.04496581               |
| 13520010               | Footwear with uppers and outer soles of rubber or plastic (incl waterproof footwear and thongs) (excl sports footwear) | Consumable supplies      | 0.09132997               |
| 13520020               | Footwear with uppers of leather and outer soles of rubber or plastic (excl sports footwear)                            | Consumable supplies      | 0.09577214               |
| 13520030               | Sports footwear                                                                                                        | Consumable supplies      | 0.08961367               |
| 13520040               | Footwear with uppers of leather and outer soles of leather or composition leather (excl sports footwear)               | Consumable supplies      | 0.1020465                |
| 13520050               | Footwear nec (incl steel capped footwear)                                                                              | Consumable supplies      | 0.11231                  |
| 13520060               | Soles of or cut from rubber or rubber composition and parts of footwear nec (incl plastic heels)                       | Consumable supplies      | 0.08746938               |
| 13521700               | Footwear - commission production                                                                                       | Consumable supplies      | 122.9958                 |
| 13521970               | Waste from the manufacture of textiles, clothing or footwear (1311-1352)                                               | Consumable supplies      | 0.1682489                |

| <b>IOPC<br/>(1284)</b> | <b>Sector name</b>                                                                                                      | <b>Aggregated Sector</b> | <b>Intensity (kg/\$)</b> |
|------------------------|-------------------------------------------------------------------------------------------------------------------------|--------------------------|--------------------------|
| 14110010               | Undressed sawn timber from logs sawn at same establishment (incl treated (excl impregnated sleepers or resawn)); shooks | Consumable supplies      | 0.2958656                |
| 14110020               | Treated wood in the rough (excl sawn timber, dressed or undressed); impregnated railway sleepers                        | Consumable supplies      | 0.2853426                |
| 14110030               | Ground bark                                                                                                             | Consumable supplies      | 0.3034713                |
| 14120010               | Woodchips, softwood                                                                                                     | Consumable supplies      | 0.5361874                |
| 14120020               | Woodchips, hardwood                                                                                                     | Consumable supplies      | 1.1873                   |
| 14130010               | Resawn/seasoned timber (incl kiln dried)(excl sleepers, palings & shingles)                                             | Consumable supplies      | 0.2939339                |
| 14130020               | Dressed timber and mouldings of a thickness up to and including 6mm                                                     | Consumable supplies      | 0.2956275                |
| 14130030               | Dressed timber and mouldings of a thickness exceeding 6mm                                                               | Consumable supplies      | 0.2871578                |
| 14130040               | Chemically preserved re-sawn or dressed timber.                                                                         | Consumable supplies      | 0.2993467                |
| 14131700               | Drying, impregnation or chemical treatment - commission production (1411-1413)                                          | Consumable supplies      | 0.2914341                |
| 14910010               | Prefabricated or transportable wooden buildings                                                                         | Consumable supplies      | 0.2884125                |
| 14920010               | Doors, wooden                                                                                                           | Consumable supplies      | 0.2823107                |
| 14920020               | Roof trusses, wooden                                                                                                    | Consumable supplies      | 0.2864602                |
| 14920030               | Wooden wall and window (incl complete with glass) frames                                                                | Consumable supplies      | 0.2793322                |
| 14920040               | Custom made built-in wooden furniture                                                                                   | Consumable supplies      | 0.2786799                |
| 14920050               | Other wooden builders joinery and carpentry                                                                             | Consumable supplies      | 0.2778516                |
| 14930010               | Veneers (incl laminated)                                                                                                | Consumable supplies      | 0.3012314                |
| 14930020               | Plywood                                                                                                                 | Consumable supplies      | 0.2833263                |
| 14930030               | Glued laminated lumber                                                                                                  | Consumable supplies      | 0.2759276                |
| 14940010               | Fibreboard (excl fibre paperboard and particle board)                                                                   | Consumable supplies      | 0.2886427                |
| 14940020               | Cellular wood panels                                                                                                    | Consumable supplies      | 0.2783018                |
| 14940030               | Particle board (incl laminated) and similar board of wood or other ligneous materials                                   | Consumable supplies      | 0.276043                 |
| 14940040               | Laminates of timber and non-timber materials                                                                            | Consumable supplies      | 0.2867064                |
| 14940050               | Other boards manufactured from wood nec (incl densified wood in block or other shape)                                   | Consumable supplies      | 0.2898234                |

| <b>IOPC<br/>(1284)</b> | <b>Sector name</b>                                                                                                                  | <b>Aggregated Sector</b> | <b>Intensity (kg/\$)</b> |
|------------------------|-------------------------------------------------------------------------------------------------------------------------------------|--------------------------|--------------------------|
| 14990010               | Parquetry strips etc., assembled into panels; shingles and shakes                                                                   | Consumable supplies      | 0.2862345                |
| 14990020               | Pallets, cases, boxes, crates, drums, casks and barrels, wooden                                                                     | Consumable supplies      | 0.2750311                |
| 14990030               | Frames, wooden (incl for paintings, photographs, mirrors, etc)                                                                      | Consumable supplies      | 0.2746683                |
| 14990040               | Boards & similar articles nec, of vegetable fibre agglomerated with mineral binders (excl wooden boards)                            | Consumable supplies      | 0.2974716                |
| 14990050               | Moulding boxes, patterns, bases; moulds for metal (excl ingot), glass, mineral materials, rubber or plastics                        | Consumable supplies      | 0.3005192                |
| 14990060               | Wooden tools, tool bodies & handles; cork articles (incl agglomerated)(excl gaskets for motor vehicles); other products of wood nec | Consumable supplies      | 0.2772819                |
| 14991700               | Other wood products - commission production (1491-1499)                                                                             | Consumable supplies      | 0.2762442                |
| 15100010               | Mechanical, chemical and semi-chemical wood pulp and residual lyes from wood pulp (excl tall oil)                                   | Consumable supplies      | 0.8199263                |
| 15100020               | Newsprint                                                                                                                           | Consumable supplies      | 0.8499942                |
| 15100030               | Paper stock (incl toilet, facial tissue and similar paper stock used for household or sanitary purposes)                            | Consumable supplies      | 0.8198681                |
| 15100040               | Copying paper nec                                                                                                                   | Consumable supplies      | 1.111551                 |
| 15100050               | Paper and paperboard, coated, impregnated, covered, surface-coloured, surface-decorated nec                                         | Consumable supplies      | 1.069415                 |
| 15100060               | Paper and paperboard, uncoated nec                                                                                                  | Consumable supplies      | 1.198566                 |
| 15101700               | Paper - commission production                                                                                                       | Consumable supplies      | 0.8612863                |
| 15210010               | Solid and corrugated paperboard containers                                                                                          | Consumable supplies      | 0.5076364                |
| 15210020               | Corrugated paperboard sheeting                                                                                                      | Consumable supplies      | 0.5226374                |
| 15220010               | Paper bags, packets and sacks (incl paper multiwall bags) (excl bags of composite material)                                         | Consumable supplies      | 0.6658321                |
| 15230010               | Envelopes (paper), letter & correspondence cards (excl printed or illustrated); paper wallets & writing compendiums of paper        | Consumable supplies      | 0.616613                 |

| <b>IOPC<br/>(1284)</b> | <b>Sector name</b>                                                                                                   | <b>Aggregated Sector</b> | <b>Intensity (kg/\$)</b> |
|------------------------|----------------------------------------------------------------------------------------------------------------------|--------------------------|--------------------------|
| 15230020               | Exercise books, registers, account books, diaries, board games and other paper stationery (excl commission printing) | Consumable supplies      | 0.608743                 |
| 15240010               | Toilet, tissues, serviettes, towels & similar paper for household & sanitary purposes, in sheets or perforated rolls | Consumable supplies      | 0.5857647                |
| 15240020               | Baby napkins (excl textile), sanitary towels and tampons of paper or cellulose wadding                               | Consumable supplies      | 0.5899131                |
| 15290010               | Paper and paperboard trays, dishes, plates, cups, cones, egg containers and box files                                | Consumable supplies      | 0.5398913                |
| 15290020               | Paper festival, carnival or other entertainment articles (incl conjuring tricks, novelties, Christmas decorations)   | Consumable supplies      | 0.5491694                |
| 15290030               | Adhesive paper labels (excl printed)                                                                                 | Consumable supplies      | 0.003726712              |
| 15290040               | Other paper, paper pulp or paperboard products (incl wallpaper and liquid activated gummed or adhesive paper)        | Consumable supplies      | 0.4345793                |
| 15291700               | Paper products - commission production (1521-1529)                                                                   | Consumable supplies      | 0.5255207                |
| 15291970               | Waste from manufacture of wood and paper products (1411-1529)                                                        | Consumable supplies      | 1.156677                 |
| 15291980               | General government consumption of fixed capital (1521-1529)                                                          | Other                    | 122.9283                 |
| 16110010               | Books (incl atlases & touring guides), maps, charts, plans, sheet music printed but not published by this business   | Consumable supplies      | 0.0284227                |
| 16110020               | Newspapers, journals and periodicals printed but not published by this business once a week or more                  | Consumable supplies      | 0.4667419                |
| 16110030               | Newspapers, journals and periodicals printed but not published by this business less than weekly                     | Consumable supplies      | 0.1588223                |
| 16110040               | Security printed material (incl stamps, cheque books, banknotes, share documents and airline tickets)                | Consumable supplies      | 0.585968                 |
| 16110050               | Paper labels, printed or imprinted (but not published)                                                               | Consumable supplies      | 0.523641                 |
| 16110060               | Letter and correspondence cards (printed but not published), postcards                                               | Consumable supplies      | 0.5669706                |

| <b>IOPC<br/>(1284)</b> | <b>Sector name</b>                                                                                                       | <b>Aggregated Sector</b>    | <b>Intensity (kg/\$)</b> |
|------------------------|--------------------------------------------------------------------------------------------------------------------------|-----------------------------|--------------------------|
| 16110070               | Trade advertising material or commercial catalogues printed but not published by this business; other printed matter nec | Consumable supplies         | 0.5724914                |
| 16120010               | Composed type, prepared printing plates/cylinders, lithographic stones or other impressed media for use in printing      | Consumable supplies         | 0.9358896                |
| 16120020               | Printing trade services nec (excluding desktop publishing)                                                               | Services                    | 0.4734009                |
| 16200010               | Pre-recorded Audio and Video tapes, manufactured but not published by this business                                      | Other manufactured products | 0.3984346                |
| 16200020               | Reproduced computer software, manufactured but not published by this business                                            | Other manufactured products | 0.6532463                |
| 16200030               | Pre-recorded Audio CD's and DVD's, manufactured but not published by this business                                       | Other manufactured products | 0.7103247                |
| 16200040               | Other pre-recorded media (including records), manufactured but not published by this business                            | Other manufactured products | 1.18216                  |
| 16201980               | General government consumption of fixed capital (1611-1620)                                                              | Other                       | 123.1907                 |
| 17010010               | Automotive petrol; gasoline refining or blending; motor spirit (incl aviation spirit)                                    | Other manufactured products | 0.3923239                |
| 17010020               | Kerosene (incl kerosene type jet fuel)                                                                                   | Other manufactured products | 0.4877372                |
| 17010030               | Gas oil or fuel oil (excl motor spirit and kerosene)                                                                     | Other manufactured products | 0.4553862                |
| 17010040               | Petroleum bitumen; residues of petroleum oils and bituminous minerals; petroleum coke                                    | Other manufactured products | 0.4459244                |
| 17010050               | Liquefied petroleum gas produced at refineries                                                                           | Other manufactured products | 0.5429938                |
| 17010060               | Lubricating, heavy petroleum & bituminous oils; solvents; topped/enriched crude, refinery products nec                   | Other manufactured products | 0.2339518                |
| 17090010               | Metallurgical coke, coke breeze, retort carbon and char (excl bone char)                                                 | Other manufactured products | 0.5593217                |
| 17090020               | Pitch and pitch coke obtained from mineral tars                                                                          | Other manufactured products | 0.3773654                |
| 17090030               | Mineral turpentine                                                                                                       | Other manufactured products | 0.401749                 |
| 17090040               | Petroleum jelly; paraffin wax and other mineral waxes                                                                    | Consumable supplies         | 0.5376638                |
| 17090050               | Toluol, xylol, not chemically or commercially pure; benzole and benzene from petroleum                                   | Other manufactured products | 0.5373867                |
| 17090060               | Phenol                                                                                                                   | Other manufactured products | 0.5282671                |

| <b>IOPC<br/>(1284)</b> | <b>Sector name</b>                                                                                                                 | <b>Aggregated Sector</b>              | <b>Intensity (kg/\$)</b> |
|------------------------|------------------------------------------------------------------------------------------------------------------------------------|---------------------------------------|--------------------------|
| 17090070               | Styrene                                                                                                                            | Other manufactured products           | 0.3866076                |
| 17090080               | Chloroform and other halomethanes                                                                                                  | Other manufactured products           | 0.4776877                |
| 17090090               | Carbon tetrachloride                                                                                                               | Other manufactured products           | 0.000764093              |
| 17090100               | Brake and hydraulic fluid                                                                                                          | Other manufactured products           | 0.4855483                |
| 17090110               | Rust arresting compound                                                                                                            | Other manufactured products           | 0.5619567                |
| 17090120               | Bituminous mixtures and other articles of asphalt                                                                                  | Other manufactured products           | 0.417505                 |
| 17090130               | Petroleum and coal products nec.                                                                                                   | Other manufactured products           | 0.5905971                |
| 17091700               | Petroleum and coal products - commission production (1701-1709)                                                                    | Other manufactured products           | 0.391191                 |
| 17091970               | Waste from the manufacture of Petroleum and Coal products (1701-1709)                                                              | Other manufactured products           | 0.3740855                |
| 18110010               | Acetylene gas                                                                                                                      | Other manufactured products           | 0.5620388                |
| 18110020               | Hydrogen, rare gases, nitrogen, medicinal gases (incl nitrous oxide and oxygen), carbon dioxide (incl dry ice) and carbon monoxide | Pharmaceutical and medicinal supplies | 0.489905                 |
| 18110030               | Ethylene gas                                                                                                                       | Other manufactured products           | 0.5693                   |
| 18110040               | Liquefied natural gas (other than from the well head)                                                                              | Other manufactured products           | 25.19512                 |
| 18110050               | Hydrogen sulphide, Sulphur dioxide and other industrial organic and inorganic gases nec                                            | Other manufactured products           | 27.32003                 |
| 18120010               | Carbon black                                                                                                                       | Other manufactured products           | 0.6191815                |
| 18120020               | Synthetic organic colouring agents & preparations (incl colour lakes, pigments & dyes of vegetable or animal origin)               | Other manufactured products           | 0.4985369                |
| 18120030               | Hydrocarbons and derivatives (incl ethane, butane and benzene other than from petroleum and iron and steel)                        | Other manufactured products           | 0.5708725                |
| 18120040               | Nitrogen-function compounds (excl saccharin)                                                                                       | Other manufactured products           | 0.5632004                |
| 18120050               | Organo-inorganic compounds; heterocyclic compounds; nucleic acids                                                                  | Other manufactured products           | 0.5673493                |
| 18120060               | Carboxylic, monocarboxylic & polycarboxylic acids and derivatives (excl pharmaceutical goods)                                      | Other manufactured products           | 1.311446                 |
| 18120070               | Ethyl alcohol pure                                                                                                                 | Consumable supplies                   | 0.4984531                |
| 18120080               | Other alcohols, phenols (excl phenol), phenol-alcohols and derivatives; fatty acids (purity less than 90%)                         | Consumable supplies                   | 0.1293486                |

| <b>IOPC<br/>(1284)</b> | <b>Sector name</b>                                                                                                              | <b>Aggregated Sector</b>    | <b>Intensity (kg/\$)</b> |
|------------------------|---------------------------------------------------------------------------------------------------------------------------------|-----------------------------|--------------------------|
| 18120090               | Plasticiser; mixed alkylbenzenes and alkyl naphthalenes nec; other chemical products and preparations nec                       | Other manufactured products | 0.5512908                |
| 18120100               | Ethers, alcohol peroxides, ether peroxides, epoxides, acetals and hemiacetals and derivatives; organic chemicals nec            | Other manufactured products | 0.5593017                |
| 18130010               | Hydrochloric, chlorosulphuric, sulphuric (incl oleum), diphosphorous pentaoxide, phosphoric, and polyphosphoric acids           | Other manufactured products | 0.5576352                |
| 18130020               | Nitric, sulphonitric and other inorganic acids; inorganic oxygen compounds of non-metals (excl industrial gases)                | Other manufactured products | 0.5430983                |
| 18130030               | Synthetic inorganic colouring agents and preparations (incl inorganic pigments and chemical whites)                             | Other manufactured products | 2.217723                 |
| 18130040               | Refined salt other than cooking or table salt                                                                                   | Other manufactured products | 1.111788                 |
| 18130050               | Triammonium phosphate; ammonia (excl fertiliser); ammonium chloride & carbonates; potassium nitrate                             | Other manufactured products | 3.450784                 |
| 18130060               | Prepared pigments, opacifiers, colours, glazes used in ceramic, enamel, glass industry; glass powder, granules/flakes           | Other manufactured products | 0.5814591                |
| 18130070               | Artificial graphite; colloidal or semi-colloidal graphite; preparations based on carbon in form of semi-manufactures            | Other manufactured products | 0.7607828                |
| 18130080               | Radioactive elements, nuclear reactor fuel elements, isotopes and compounds; alloys, dispersions, ceramic products and mixtures | Consumable supplies         | 1.152009                 |
| 18130090               | Other inorganic chemicals nec                                                                                                   | Other manufactured products | 1.079597                 |
| 18210010               | Synthetic rubber                                                                                                                | Other manufactured products | 0.5624649                |
| 18210020               | Polystyrene                                                                                                                     | Other manufactured products | 0.5368608                |
| 18210030               | Polyethylene                                                                                                                    | Other manufactured products | 0.8920688                |
| 18210040               | Polyvinyl chloride                                                                                                              | Other manufactured products | 0.5319585                |
| 18210050               | Polypropylene                                                                                                                   | Other manufactured products | 0.622262                 |
| 18210060               | Polyvinyl acetate & synthetic resins nec (excl adhesives) in primary forms, not mixed/compounded (excl regrated)                | Other manufactured products | 0.5697853                |

| <b>IOPC<br/>(1284)</b> | <b>Sector name</b>                                                                                                   | <b>Aggregated Sector</b>              | <b>Intensity (kg/\$)</b> |
|------------------------|----------------------------------------------------------------------------------------------------------------------|---------------------------------------|--------------------------|
| 18210070               | Rosin and resin acids, and derivatives thereof, rosin spirit and rosin oils; run gums                                | Other manufactured products           | 0.5657288                |
| 18210080               | Plastics in primary forms, mixed/compounded with other substances; regranulated, single thermoplastic scrap material | Other manufactured products           | 0.5593288                |
| 18290010               | Cellulose fibre or filament                                                                                          | Other manufactured products           | 130.9859                 |
| 18290020               | Non-cellulose fibre or filament                                                                                      | Other manufactured products           | 131.9406                 |
| 18290030               | Synthetic fibre or filament nec                                                                                      | Other manufactured products           | 0.5615844                |
| 18290040               | Basic polymers nec                                                                                                   | Other manufactured products           | 0.5419227                |
| 18310010               | Ammonia aqua or urea, fertiliser grade; ammonium sulphate                                                            | Other manufactured products           | 0.554759                 |
| 18310020               | Superphosphate and other phosphatic fertilisers                                                                      | Other manufactured products           | 0.5370926                |
| 18310030               | Ammonium nitrate (excl explosive)                                                                                    | Other manufactured products           | 0.6821586                |
| 18310040               | Mixed fertilisers                                                                                                    | Other manufactured products           | 0.6430038                |
| 18310050               | Ground phosphate                                                                                                     | Other manufactured products           | 0.4944644                |
| 18310060               | Fertilisers nec                                                                                                      | Other manufactured products           | 0.5583217                |
| 18320010               | Insecticides, pesticides, fungicides, weedkillers and pest control chemicals nec                                     | Other manufactured products           | 0.5708458                |
| 18321700               | Basic Chemicals - commission production (1811-1832)                                                                  | Other manufactured products           | 0.5820897                |
| 18321970               | Waste from the manufacture of basic chemicals (1811-1832)                                                            | Other manufactured products           | 0.4191944                |
| 18410010               | Pharmaceutical goods, for human use (excl wadding, gauze, bandages and surgical sutures)                             | Pharmaceutical and medicinal supplies | 0.2677511                |
| 18411700               | Human Pharmaceutical and Medicinal Products - commission production                                                  | Pharmaceutical and medicinal supplies | 108.6185                 |
| 18420010               | Animal feed supplements                                                                                              | Other manufactured products           | 0.0479595                |
| 18420020               | Pharmaceutical goods for veterinary use                                                                              | Other manufactured products           | 0.04675706               |
| 18421700               | Veterinary Pharmaceutical and Medicinal Products - commission production                                             | Other manufactured products           | 39.50202                 |
| 18421970               | Waste from the manufacture of pharmaceutical goods for human or veterinary use (1841-1842)                           | Pharmaceutical and medicinal supplies | 122.9803                 |
| 18510010               | Glycerol (glycerine), glycerol waters and lyes                                                                       | Other manufactured products           | 0.2896899                |
| 18510020               | Candles and tapers                                                                                                   | Other manufactured products           | 0.290496                 |
| 18510030               | Soap and soap based products                                                                                         | Consumable supplies                   | 0.2932632                |
| 18510040               | Toothpaste and other dentifrices                                                                                     | Consumable supplies                   | 0.2175275                |
| 18510050               | Laundry bleach                                                                                                       | Consumable supplies                   | 0.3848872                |

| <b>IOPC<br/>(1284)</b> | <b>Sector name</b>                                                                                                                                  | <b>Aggregated Sector</b>    | <b>Intensity (kg/\$)</b> |
|------------------------|-----------------------------------------------------------------------------------------------------------------------------------------------------|-----------------------------|--------------------------|
| 18510060               | Disinfectants (incl phenyl)                                                                                                                         | Consumable supplies         | 0.2651484                |
| 18510070               | Anionic, cationic and other organic surface active agents (excl soap)                                                                               | Consumable supplies         | 0.3851323                |
| 18510080               | Scouring preparations and abrasive cleaners                                                                                                         | Consumable supplies         | 0.3095879                |
| 18510090               | Surface cleaning, washing and degreasing preparations nec (incl oven and stove cleaners)                                                            | Consumable supplies         | 0.3514929                |
| 18510100               | Other cleaning polishes, creams and waxes nec                                                                                                       | Consumable supplies         | 0.3364588                |
| 18520010               | Barrier creams and toilet lanolin; suncreening preparations                                                                                         | Consumable supplies         | 0.3257774                |
| 18520020               | Hair shampoo, conditioner, sprays, colouring and other hairdressing preparations                                                                    | Consumable supplies         | 0.3908196                |
| 18520030               | Aftershave & shaving preparations; lipstick, eye makeup; beauty cream or lotions; face lotions & powders                                            | Consumable supplies         | 0.3860041                |
| 18520040               | Hand cream or lotions (excl barrier & medicated cream); nail polishes & other nail care preparations                                                | Consumable supplies         | 0.4249827                |
| 18520050               | Perfume, deodorants, bath salts, depilatories, talcum powder and other preparations nec                                                             | Consumable supplies         | 0.364413                 |
| 18521700               | Cleaning Compounds and Toiletry Preparations - commission production (1851-1852)                                                                    | Consumable supplies         | 0.2898357                |
| 18521970               | Waste from the manufacture of cleaning compounds and toiletry preparations (1851 -1852)                                                             | Consumable supplies         | 122.9801                 |
| 18910010               | Photographic, film, cloth, plates (sensitised), photographic chemicals and photographic paper (sensitised)                                          | Other manufactured products | 0.7386116                |
| 18920010               | Safety fuses, detonating fuses or caps                                                                                                              | Other manufactured products | 0.2415416                |
| 18920020               | Explosives and other pyrotechnic articles (incl Ammonium nitrate (explosive), nitrocellulose, gun cotton, signalling flares, fireworks and matches) | Other manufactured products | 0.525078                 |
| 18990010               | Eucalyptus, sandalwood and Tea-tree oil                                                                                                             | Other manufactured products | 0.6542196                |
| 18990020               | Natural gums (processed or refined)                                                                                                                 | Other manufactured products | 0.5479954                |
| 18990030               | Fluxes and other preparations (incl pickling preparations, powders and pastes) for soldering, brazing or welding                                    | Other manufactured products | 0.4984134                |
| 18990040               | Other chemical products nec                                                                                                                         | Other manufactured products | 0.6615052                |

| <b>IOPC<br/>(1284)</b> | <b>Sector name</b>                                                                                             | <b>Aggregated Sector</b>       | <b>Intensity (kg/\$)</b> |
|------------------------|----------------------------------------------------------------------------------------------------------------|--------------------------------|--------------------------|
| 18991700               | Other Basic Chemical Products - commission production (1891-1899)                                              | Other manufactured products    | 132.3712                 |
| 18991970               | Waste from the manufacture of other basic chemical products (1891-1899)                                        | Other manufactured products    | 122.98                   |
| 18991980               | General government consumption of fixed capital (1891-1899)                                                    | Other                          | 122.98                   |
| 19110010               | Self-adhesive plastic plates, film, foil, tape, strip and other flat shapes                                    | Other manufactured products    | 0.2309802                |
| 19110020               | Flexible plastic strip, plates, film, foil, tape and sheet (excl self-adhesive)                                | Other manufactured products    | 0.196825                 |
| 19110030               | Plastic-coated, pressure-sensitive, gummed or adhesive paper and paperboard                                    | Other manufactured products    | 0.2563169                |
| 19110040               | Plastic sacks, packets and bags (incl garbage bags)                                                            | Consumable supplies            | 0.2428373                |
| 19110050               | Textile fabrics (excl tyre cord) impregnated, coated, covered or laminated with plastics                       | Consumable supplies            | 0.2408853                |
| 19120010               | Plastic bottles                                                                                                | Consumable supplies            | 0.2517356                |
| 19120020               | Plastic table and kitchenware (incl disposable cups), other household (incl buckets) and toilet articles       | Consumable supplies            | 0.2838131                |
| 19120030               | Complete and assembled other domestic furniture (plastic only) not elsewhere specified                         | Other furniture                | 3.14196E-05              |
| 19120040               | Other complete and assembled non-domestic furniture (plastic only) nec                                         | Other furniture                | 0.2297998                |
| 19120050               | Other medical, dental, surgical or veterinary furniture and parts (plastic only)                               | Medical and surgical furniture | 0.2561911                |
| 19120060               | Unassembled or partly assembled domestic furniture and parts (plastic only) nec                                | Other furniture                | 0.242343                 |
| 19120070               | Unassembled or partly assembled non-domestic furniture and parts (plastic only) nec                            | Other furniture                | 0.2337239                |
| 19120080               | Plastic pipes                                                                                                  | Consumable supplies            | 0.2491912                |
| 19120090               | Plastic fittings for tubes, pipes and hoses (incl joints, elbows and flanges)                                  | Consumable supplies            | 0.2730275                |
| 19120100               | Plastic taps, cocks, valves and similar attachments                                                            | Consumable supplies            | 0.2475901                |
| 19120110               | Plastic drums, drum linings, boxes, cases, crates & packaging accessories. (incl stoppers, lids, caps & seals) | Consumable supplies            | 0.232913                 |
| 19120120               | Polycarbonate sheets                                                                                           | Other manufactured products    | 0.2519193                |

| <b>IOPC<br/>(1284)</b> | <b>Sector name</b>                                                                                                                       | <b>Aggregated Sector</b>    | <b>Intensity (kg/\$)</b> |
|------------------------|------------------------------------------------------------------------------------------------------------------------------------------|-----------------------------|--------------------------|
| 19120130               | Plastic blow moulded products nec                                                                                                        | Consumable supplies         | 0.2555379                |
| 19120140               | Other rigid or semi-rigid plastic injection moulded products (excl toys, games and fibre reinforced products)                            | Consumable supplies         | 0.238746                 |
| 19120150               | Rigid and semi-rigid polymer products nec (excl fibre reinforced plastic products)                                                       | Consumable supplies         | 0.2547517                |
| 19130010               | Foam and sponge plastic sheets, plates and strip (incl foam insulation and padding)                                                      | Consumable supplies         | 0.2377928                |
| 19130020               | Plastic foam products nec                                                                                                                | Consumable supplies         | 0.2484112                |
| 19140010               | New pneumatic, rubber tyres for motor cars and motor cycles                                                                              | Other manufactured products | 0.2360287                |
| 19140020               | New pneumatic, rubber tyres for buses and lorries                                                                                        | Other manufactured products | 0.001687027              |
| 19140030               | Tyres (solid rubber)                                                                                                                     | Other manufactured products | 0.1898664                |
| 19140040               | Tyres, rubber nec (incl retreaded tyres)                                                                                                 | Other manufactured products | 0.2561336                |
| 19140050               | Pneumatic rubber tubes                                                                                                                   | Other manufactured products | 0.304566                 |
| 19140060               | Camel-back and unvulcanised rubber strip for retreading rubber tyres                                                                     | Other manufactured products | 0.08397658               |
| 19150010               | Adhesives (excl bituminous) and glues                                                                                                    | Other manufactured products | 0.259966                 |
| 19160010               | Architectural & decorative paints (incl coatings for use on buildings), enamels & clears (excl heavy duty coatings)                      | Other manufactured products | 0.2318679                |
| 19160020               | Automotive paints (incl primer & undercoats), enamels, lacquers (excl heavy duty coatings & bituminous mastics)                          | Other manufactured products | 0.4336295                |
| 19160030               | Industrial paints (incl primer, undercoats, finishing coats and heavy duty coats), enamels and clears                                    | Other manufactured products | 0.2376479                |
| 19160040               | Inks                                                                                                                                     | Other manufactured products | 0.2512869                |
| 19160050               | Filler or putty, caulking compound                                                                                                       | Other manufactured products | 0.2563624                |
| 19160060               | Other paints (incl marine coatings) and other allied products (incl thinners, wood stains, paint, rubbing compounds and varnish remover) | Other manufactured products | 0.2625337                |
| 19190010               | Plastic tubes and hoses                                                                                                                  | Consumable supplies         | 0.2982578                |
| 19190020               | Plastic conveyor belting                                                                                                                 | Other manufactured products | 0.2636343                |
| 19190030               | Plastic wall or ceiling coverings (excl tiles)                                                                                           | Other manufactured products | 0.2328892                |
| 19190040               | Linoleum and other floor coverings with a textile base; plastic floor coverings (incl paper or paperboard base), wall or ceiling tiles   | Other manufactured products | 0.2525415                |

| <b>IOPC<br/>(1284)</b> | <b>Sector name</b>                                                                                                    | <b>Aggregated Sector</b>    | <b>Intensity (kg/\$)</b> |
|------------------------|-----------------------------------------------------------------------------------------------------------------------|-----------------------------|--------------------------|
| 19190060               | Rigid fibre reinforced plastic articles (incl swimming pool shells and tanks)                                         | Other manufactured products | 0.2525733                |
| 19190070               | Other plastic injection moulded products nec (excl rigid or semi-rigid)                                               | Consumable supplies         | 0.2356874                |
| 19190080               | Artificial guts (sausage casing) of hardened protein or of cellulosic materials                                       | Other manufactured products | 0.409114                 |
| 19190090               | Synthetic rubber products and other polymer products nec (excl rigid or semi-rigid)                                   | Consumable supplies         | 0.273335                 |
| 19191700               | Polymer Products - commission production (1911-1919)                                                                  | Other manufactured products | 0.2438572                |
| 19200010               | Rubber gloves, mittens and mitts                                                                                      | Consumable supplies         | 0.35343                  |
| 19200020               | Rubber belting (incl V belts)                                                                                         | Other manufactured products | 0.3337259                |
| 19200030               | Rubber tubes, pipes and hose                                                                                          | Consumable supplies         | 0.29541                  |
| 19200040               | Rubber sheets, strips, plates, rods, profile shapes and primary forms (excl cellular)                                 | Other manufactured products | 0.3369688                |
| 19200050               | Sponge and foam rubber                                                                                                | Consumable supplies         | 0.3042978                |
| 19200060               | Other natural rubber products nec                                                                                     | Other manufactured products | 0.2912829                |
| 19201700               | Natural Rubber Products - commission production                                                                       | Other manufactured products | 131.7354                 |
| 19201970               | Waste from manufacture of polymer products, rubber, natural rubber and rubber products (1911-1920)                    | Other manufactured products | 0.2845135                |
| 20100010               | Float, surface ground/polished glass, in sheets; cast & rolled glass, in sheets or profiles; but not otherwise worked | Other manufactured products | 0.8854185                |
| 20100020               | Safety glass (incl windscreens and laminated sheet glass)                                                             | Other manufactured products | 0.8864115                |
| 20100030               | Glass containers, bottles or jars; glass stoppers; glass inners for vacuum vessels                                    | Consumable supplies         | 0.898611                 |
| 20100040               | Rear-view mirrors for vehicles                                                                                        | Other manufactured products | 0.000502158              |
| 20100050               | Glassware nec                                                                                                         | Consumable supplies         | 0.9315879                |
| 20101700               | Glass and glass products - commission production                                                                      | Consumable supplies         | 0.8528134                |
| 20210010               | Clay bricks (excl refractory bricks)                                                                                  | Other manufactured products | 0.2899541                |
| 20290010               | Refractory products (incl bricks, cement and clay)                                                                    | Other manufactured products | 0.3077305                |
| 20290020               | Ceramic roofing, flooring and wall tiles (incl terracotta) and ceramic construction goods nec                         | Other manufactured products | 0.3069674                |
| 20290030               | Ceramic wash basins and permanent fixture type sanitary ware                                                          | Consumable supplies         | 0.3094487                |

| <b>IOPC<br/>(1284)</b> | <b>Sector name</b>                                                                                                   | <b>Aggregated Sector</b>    | <b>Intensity (kg/\$)</b> |
|------------------------|----------------------------------------------------------------------------------------------------------------------|-----------------------------|--------------------------|
| 20290040               | Tableware, ornamental pottery and domestic ware nec                                                                  | Consumable supplies         | 0.3390012                |
| 20290050               | Ceramic goods nec                                                                                                    | Other manufactured products | 0.3433215                |
| 20291700               | Ceramic products - commission production (2021-2029)                                                                 | Other manufactured products | 122.7716                 |
| 20310010               | Cement (incl hydraulic and portland) (excl adhesive or refractory)                                                   | Other manufactured products | 0.7247445                |
| 20310020               | Lime (incl hydraulic, quick, hydrated, slaked and agricultural)                                                      | Other manufactured products | 0.7664367                |
| 20320010               | Plaster boards, sheets, panels, tiles, cornices and other articles of plaster (excl ornamental)                      | Other manufactured products | 0.7714487                |
| 20320020               | Plasters (incl plaster of paris)(excl dental plasters)                                                               | Consumable supplies         | 0.8319034                |
| 20330010               | Ready mixed concrete and mortar (incl dry mix concrete)                                                              | Other manufactured products | 0.753821                 |
| 20331700               | Cement, lime and ready-mixed concrete - commission production (2031, 2033)                                           | Other manufactured products | 0.7654381                |
| 20340010               | Concrete, cement, fibrous-cement or artificial stone pipes; concrete box culverts                                    | Other manufactured products | 0.8040848                |
| 20340020               | Concrete, cement and artificial stone bricks, blocks, building boards and tiles                                      | Other manufactured products | 0.7482784                |
| 20340030               | Concrete or predominantly concrete prefabricated and transportable buildings                                         | Other manufactured products | 0.7836462                |
| 20341700               | Plaster and concrete products - commission production (2032, 2034)                                                   | Other manufactured products | 0.3505099                |
| 20900010               | Worked monumental or building stone                                                                                  | Other manufactured products | 0.3144141                |
| 20900020               | Glass fibre and glass wool products                                                                                  | Other manufactured products | 0.3185806                |
| 20900030               | Ground limestone                                                                                                     | Other manufactured products | 0.2916691                |
| 20900040               | Ground clays (excl colours); andalusite, kyanite & sillimanite; mullite; chamotte & dinas earths                     | Other manufactured products | 0.5048278                |
| 20900050               | Ground mica; feldspar; leucite; nepheline ; ground natural abrasives; crushed, powdered natural steatite and talc    | Other manufactured products | 0.986932                 |
| 20900060               | Ground minerals & fluorspar (excl abrasives, dust & powders of natural & synthetic precious or semi-precious stones) | Other manufactured products | 0.6443818                |

| <b>IOPC<br/>(1284)</b> | <b>Sector name</b>                                                                                                                            | <b>Aggregated Sector</b>    | <b>Intensity (kg/\$)</b> |
|------------------------|-----------------------------------------------------------------------------------------------------------------------------------------------|-----------------------------|--------------------------|
| 20900070               | Non-refractory mortars and concretes other than ready mixed; articles of asbestos-cement and cellulose fibre-cement nec                       | Other manufactured products | 0.4040971                |
| 20900080               | Other non-metallic mineral products                                                                                                           | Other manufactured products | 0.3144819                |
| 20901700               | Other non-metallic mineral products - commission production                                                                                   | Other manufactured products | 122.9262                 |
| 20901970               | Waste from the manufacture of non-metallic mineral products (2010-2090)                                                                       | Other manufactured products | 0.7509837                |
| 21100010               | Basic iron, pig iron, sponge iron and spiegeleisen; iron or steel granules and powders                                                        | Other manufactured products | 1.733085                 |
| 21100020               | Ferro-alloys (incl manganese, silicon or chrome)                                                                                              | Other manufactured products | 2.146675                 |
| 21100030               | Iron or steel primary forms (incl ingots) and semi-finished products                                                                          | Other manufactured products | 1.746739                 |
| 21100040               | Iron or non-alloy steel flat-rolled products (excl clad, plated or coated)                                                                    | Other manufactured products | 3.273814                 |
| 21100050               | Clad, plated or coated iron or non-alloy steel flat-rolled products                                                                           | Other manufactured products | 1.866591                 |
| 21100060               | Alloy steel flat-rolled products                                                                                                              | Other manufactured products | 1.800367                 |
| 21100070               | Iron and steel bars, rods, angles, shapes and sections (incl sheet piling)                                                                    | Other manufactured products | 1.790907                 |
| 21100080               | Iron or steel wire for further processing (excl fencing, stranded or barbed)                                                                  | Other manufactured products | 1.870149                 |
| 21100090               | Painted, varnished or coated steel sheet, profile decking or cladding (incl steel sheeting for fencing)                                       | Other manufactured products | 1.753439                 |
| 21100100               | Iron or steel rails, rail fastenings or other rail accessories                                                                                | Other manufactured products | 2.02223                  |
| 21100110               | Iron or steel expanded metal                                                                                                                  | Other manufactured products | 1.76447                  |
| 21100120               | Light oils obtained as a by-product from metallurgical coke (excl grease oils, toluole and xylene); Benzole from iron and steel manufacturing | Other manufactured products | 4610.207                 |
| 21100130               | Crude tar                                                                                                                                     | Other manufactured products | 22724.99                 |
| 21100140               | Gas from coke works or blast furnaces                                                                                                         | Other manufactured products | 3019.811                 |
| 21210010               | Cast iron tubes, pipes and hollow profiles; cast iron or cast steel tube or pipe fittings                                                     | Other manufactured products | 1.932059                 |
| 21210020               | Cast iron or cast steel steam, gas and water fittings other than domestic (incl taps, cocks and valves)                                       | Other manufactured products | 1.808451                 |
| 21210030               | Cast articles of iron or steel nec                                                                                                            | Other manufactured products | 1.672709                 |

| <b>IOPC<br/>(1284)</b> | <b>Sector name</b>                                                                                     | <b>Aggregated Sector</b>    | <b>Intensity (kg/\$)</b> |
|------------------------|--------------------------------------------------------------------------------------------------------|-----------------------------|--------------------------|
| 21220010               | Iron or steel seamless tubes or pipes (excl cast or forged)                                            | Other manufactured products | 1.841158                 |
| 21220020               | Iron or steel tubes, pipes, hollow profiles and fittings (excl cast iron or seamless)                  | Other manufactured products | 1.810395                 |
| 21220030               | Steel steam, gas and water fittings other than domestic (incl taps, cocks and valves)(excl cast steel) | Other manufactured products | 1.948885                 |
| 21221700               | Iron and steel - commission production (2110-2122)                                                     | Other manufactured products | 1.752249                 |
| 21221970               | Waste from manufacture of iron and steel (incl slag, dross, sealings and scrap steel) (2110-2122)      | Other manufactured products | 32.8393                  |
| 21310010               | Alumina                                                                                                | Other manufactured products | 9.698656                 |
| 21320010               | Aluminium and aluminium alloys (excl purchased scrap)                                                  | Other manufactured products | 14.52803                 |
| 21320020               | Aluminium secondary recovery from purchased scrap                                                      | Other manufactured products | 9.495968                 |
| 21320030               | Aluminium castings and diecastings                                                                     | Other manufactured products | 0.9652837                |
| 21321970               | Aluminium scrap from the manufacture of alumina, aluminium and aluminium alloys (2131-2132)            | Other manufactured products | 122.9878                 |
| 21330010               | Silver primary and secondary recovery (excl from purchased scrap)                                      | Other manufactured products | 1.07366                  |
| 21330020               | Copper (including brass) primary and secondary recovery (excl from purchased scrap)                    | Other manufactured products | 1.126536                 |
| 21330030               | Lead primary and secondary recovery (excl from purchased scrap)                                        | Other manufactured products | 15.71765                 |
| 21330040               | Zinc primary and secondary recovery (excl from purchased scrap)                                        | Other manufactured products | 20.36585                 |
| 21330050               | Silver, copper (including brass), lead and zinc recovery from purchased scrap                          | Other manufactured products | 7.216973                 |
| 21330060               | Zinc alloys; copper matte; cement copper; unwrought copper and nickel                                  | Other manufactured products | 7.438767                 |
| 21330070               | Sulphuric acid from the smelting of copper, silver, lead and zinc.                                     | Other manufactured products | 1.037784                 |
| 21390010               | Platinum primary and secondary recovery (excl from purchased scrap)                                    | Other manufactured products | 1.448806                 |

| <b>IOPC<br/>(1284)</b> | <b>Sector name</b>                                                                                                              | <b>Aggregated Sector</b>    | <b>Intensity (kg/\$)</b> |
|------------------------|---------------------------------------------------------------------------------------------------------------------------------|-----------------------------|--------------------------|
| 21390020               | Nickel and tin primary recovery and secondary recovery from drosses, ashes or other waste materials (excl from purchased scrap) | Other manufactured products | 27.27407                 |
| 21390030               | Nickel and tin recovery from purchased scrap                                                                                    | Other manufactured products | 2.839848                 |
| 21390040               | Gold - primary and secondary (excl from purchased scrap)                                                                        | Other manufactured products | 49.41049                 |
| 21390050               | Antimony and other non-ferrous basic metals nec primary and secondary recovery                                                  | Other manufactured products | 5.864061                 |
| 21390060               | Basic precious metals (excl silver) secondary recovery from purchased scrap                                                     | Other manufactured products | 1.075225                 |
| 21390070               | Other non-ferrous metal alloys                                                                                                  | Other manufactured products | 3.638309                 |
| 21391700               | Basic non-ferrous metals - commission production (2131-2139)                                                                    | Other manufactured products | 1.207378                 |
| 21391970               | Wastes and scraps from the smelting and refining of non-ferrous metals (incl precious) (2133-2139)                              | Other manufactured products | 5.472709                 |
| 21410010               | Non-ferrous metal (excl aluminium) castings and diecastings                                                                     | Other manufactured products | 1.073609                 |
| 21420010               | Aluminium and aluminium alloy bars, rods (incl wire rod) and profiles (incl decking and cladding)                               | Other manufactured products | 1.077117                 |
| 21420020               | Aluminium foil                                                                                                                  | Other manufactured products | 1.090659                 |
| 21420030               | Rolled, drawn or extruded aluminium pipes, tubes, plates, sheets, strip & wire products; aluminium powders & flakes             | Other manufactured products | 1.13876                  |
| 21490010               | Copper, copper alloy, nickel, lead, zinc and tin rolled, extruded and semi-finished products                                    | Other manufactured products | 1.971441                 |
| 21490020               | Silver and platinum rolled, drawn or extruded semi-finished products                                                            | Other manufactured products | 1.179909                 |
| 21490030               | Semi-manufactures of tungsten, molybdenum, tantalum, magnesium, cobalt, cadmium, titanium, zirconium and thallium               | Other manufactured products | 0.2978005                |
| 21490040               | Non-ferrous (excl aluminium) metal powders and flakes                                                                           | Other manufactured products | 316.0247                 |
| 21491700               | Basic non-ferrous metal products - commission production (2141-2149)                                                            | Other manufactured products | 1.044385                 |
| 21491970               | Wastes and scraps from the manufacture of non-ferrous metal products (incl precious) (2141-2149)                                | Other manufactured products | 2.828047                 |
| 22100010               | Iron or steel pieces roughly shaped by forging                                                                                  | Other manufactured products | 1.169981                 |

| <b>IOPC<br/>(1284)</b> | <b>Sector name</b>                                                                                                       | <b>Aggregated Sector</b>    | <b>Intensity (kg/\$)</b> |
|------------------------|--------------------------------------------------------------------------------------------------------------------------|-----------------------------|--------------------------|
| 22100020               | Forged iron or steel tyres and wheels for railway or tramway locomotives and rolling stock                               | Other manufactured products | 1.262435                 |
| 22100030               | Iron or steel chain (other than articulated link chain) and other forged articles of iron or steel                       | Other manufactured products | 1.379882                 |
| 22101700               | Forged iron or steel products - commission production                                                                    | Other manufactured products | 1.199117                 |
| 22101900               | Repairing and servicing (2210)                                                                                           | Services                    | 122.8897                 |
| 22210010               | Fabricated & prefabricated construction steel (incl scaffolding, perforated plate & ready made parts for structures)     | Other manufactured products | 0.9003789                |
| 22210020               | Reinforcing steel rods or bars                                                                                           | Other manufactured products | 0.8623627                |
| 22210030               | Reinforcing welded steel mesh                                                                                            | Other manufactured products | 0.8706325                |
| 22220010               | Prefabricated metal or metal framed buildings (excl aluminium) and other transportable buildings                         | Other manufactured products | 0.9226877                |
| 22220020               | Aluminium or aluminium framed prefabricated buildings                                                                    | Other manufactured products | 0.9456678                |
| 22230010               | Aluminium/aluminium framed doors (incl roller/concertina) & windows (incl glass); door/window frames; roller grilles     | Other manufactured products | 0.8806904                |
| 22230020               | Aluminium fire doors                                                                                                     | Other manufactured products | 0.9049054                |
| 22230030               | Aluminium combined door-window units                                                                                     | Other manufactured products | 0.8635075                |
| 22230040               | Architectural aluminium products (excl sheet metal), for building nec                                                    | Other manufactured products | 0.8942542                |
| 22230050               | Aluminium roofing and guttering                                                                                          | Other manufactured products | 0.9048589                |
| 22230060               | Other articles of aluminium (excl ladders) nec                                                                           | Other manufactured products | 0.8854077                |
| 22240010               | Metal roofing and guttering (excl aluminium)                                                                             | Other manufactured products | 0.8850051                |
| 22290010               | Iron or steel window-frames; metal (excl aluminium) door or door frames                                                  | Other manufactured products | 0.8794671                |
| 22290020               | Wooden fire doors                                                                                                        | Other manufactured products | 0.8872719                |
| 22290030               | Iron or steel fire doors; fabricated iron or steel stairs, balustrades and other architectural products (excl Aluminium) | Other manufactured products | 0.875846                 |
| 22291700               | Structural metal products - commission production (2221-2229)                                                            | Other manufactured products | 0.8660254                |
| 22291970               | Waste from the manufacture of ferrous metal products nec                                                                 | Other manufactured products | 4.482549                 |

| <b>IOPC<br/>(1284)</b> | <b>Sector name</b>                                                                                                        | <b>Aggregated Sector</b>            | <b>Intensity (kg/\$)</b> |
|------------------------|---------------------------------------------------------------------------------------------------------------------------|-------------------------------------|--------------------------|
| 22310010               | Metal cylinders (incl aerosol containers) for compressed or liquified gas                                                 | Other manufactured products         | 0.8679254                |
| 22310020               | Sheet metal reservoirs, vats, tanks and similar containers of a capacity exceeding 300 litres                             | Other manufactured products         | 0.8849453                |
| 22310030               | Sheet metal vats and tanks of a capacity not exceeding 300 litres                                                         | Other manufactured products         | 0.8852663                |
| 22310040               | Super heated water boilers & steam generators (incl parts) (excl central heating); condensers for vapour power units      | Non-medical equipment and machinery | 0.8878695                |
| 22310050               | Non-electric hot water or low pressure steam central heating boilers                                                      | Non-medical equipment and machinery | 0.8430742                |
| 22310060               | Iron, steel or aluminium vats, tanks, capacity exc. 300 litres and containers for compressed or liquefied gas             | Other manufactured products         | 0.9260343                |
| 22310070               | Plate iron, steel and aluminium vats and tanks, capacity not exc. 300 litres (excl with mechanical or thermal equipment)  | Other manufactured products         | 0.881493                 |
| 22310090               | Metal freight containers (excl stock crates)                                                                              | Other manufactured products         | 0.7450897                |
| 22390010               | Metal containers nec                                                                                                      | Other manufactured products         | 0.8835776                |
| 22390020               | Sheet metal milk and cream cans of a capacity not exceeding 300 litres                                                    | Other manufactured products         | 0.8849811                |
| 22390030               | Sheet metal household containers (excl sanitary ware)                                                                     | Other manufactured products         | 0.8943025                |
| 22390040               | Metal vacuum flasks                                                                                                       | Consumable supplies                 | 0.9561888                |
| 22400010               | Sheet metal ducting                                                                                                       | Other manufactured products         | 0.8585619                |
| 22400020               | Sheet metal sanitary ware                                                                                                 | Consumable supplies                 | 7.43671E-05              |
| 22400030               | Sheet metal stoppers, caps, lids, capsules for bottles, threaded bungs, bung covers, seals & packing accessories nec      | Other manufactured products         | 0.9066331                |
| 22400040               | Sheet metal non-electric tableware, kitchenware or other household articles and parts (excl containers and sanitary ware) | Consumable supplies                 | 0.9207821                |
| 22400050               | Sheet metal machine guards (not designed for use with a particular machine)                                               | Other manufactured products         | 0.8344911                |
| 22400060               | Sheet metal products nec                                                                                                  | Other manufactured products         | 0.8820016                |
| 22401700               | Metal container and sheet metal products - commission production (2231-2240)                                              | Other manufactured products         | 0.8782688                |

| <b>IOPC<br/>(1284)</b> | <b>Sector name</b>                                                                                                  | <b>Aggregated Sector</b>    | <b>Intensity (kg/\$)</b> |
|------------------------|---------------------------------------------------------------------------------------------------------------------|-----------------------------|--------------------------|
| 22910010               | Iron or steel fencing wire (excl stranded or barbed)                                                                | Other manufactured products | 0.5251066                |
| 22910020               | Wire stranded, cables, cordage, ropes, plaited bands and slings (excl electrically insulated slings)                | Other manufactured products | 0.6633474                |
| 22910030               | Springs (incl leaves for springs)                                                                                   | Other manufactured products | 0.5930376                |
| 22910040               | Nails, tacks, staples, spiked cramps, studs, spikes & pins (incl drawing & cotter pins) (excl metallic dowel pins)  | Other manufactured products | 0.5968484                |
| 22910050               | Woven or linked wire fabric (excl mattress supports)                                                                | Other manufactured products | 0.000104415              |
| 22910060               | Welded wire fabric (excl reinforcing)                                                                               | Other manufactured products | 0.5705403                |
| 22910070               | Iron or steel wire gates (cross-sectional dimension of wire 16mm or less)                                           | Other manufactured products | 0.2643486                |
| 22910080               | Iron or steel articulated link chain and parts                                                                      | Other manufactured products | 0.5834533                |
| 22910090               | Domestic metal wire products; copper cloth, grill, netting and fencing; barbed wire; other wire products            | Other manufactured products | 0.5814012                |
| 22920010               | Metal nuts, bolts (incl expansion), screws, rivets, washers, dowel pins, masonry anchors and turnbuckles            | Other manufactured products | 0.6192496                |
| 22930010               | Metal coating and finishing                                                                                         | Other manufactured products | 0.5643911                |
| 22990010               | Metal hand tools (incl gardening; excl power operated or pneumatic)                                                 | Other manufactured products | 0.6464128                |
| 22990030               | Cutlery, kitchen ware and table ware (excl solid silver or gold) nec                                                | Consumable supplies         | 0.2018915                |
| 22990050               | Knives and cutting blades for metal or wood working tools and machines                                              | Other manufactured products | 0.5771964                |
| 22990060               | Metal hand tool accessories & attachments (incl screwdriver & drill bits)(excl twist drills, taps, dies, chasers)   | Other manufactured products | 0.6264833                |
| 22990070               | Non-ferrous metal steam, gas and water fittings other than domestic (incl taps, cocks and valves)                   | Other manufactured products | 0.5881142                |
| 22990080               | Tube or pipe fittings (excl valves) (eg couplings, elbows, sleeves), of copper or nickel (incl alloys) or aluminium | Other manufactured products | 0.5954373                |
| 22990090               | Munitions and ammunition (incl cartridges)                                                                          | Other manufactured products | 0.6285197                |
| 22990100               | Aluminium venetian blinds (incl plastic coated)                                                                     | Other manufactured products | 0.5784571                |

| <b>IOPC<br/>(1284)</b> | <b>Sector name</b>                                                                                                      | <b>Aggregated Sector</b>            | <b>Intensity (kg/\$)</b> |
|------------------------|-------------------------------------------------------------------------------------------------------------------------|-------------------------------------|--------------------------|
| 22990110               | Metal blinds and awnings (excl aluminium venetian blinds)                                                               | Other manufactured products         | 0.5654458                |
| 22990120               | Locks (incl parts/padlocks); keys; metal fittings for windows or doors (incl hinges and hydraulic door closures)        | Other manufactured products         | 0.5881252                |
| 22990140               | Firearms (incl parts)                                                                                                   | Other manufactured products         | 0.8073509                |
| 22990150               | Fire extinguishers                                                                                                      | Other manufactured products         | 0.578074                 |
| 22990160               | Articles of tungsten, molybdenum, tantalum, magnesium, cobalt, cadmium, titanium, zirconium and thallium (incl wrought) | Other manufactured products         | 0.5977308                |
| 22990170               | Non-electric lamps and lighting fittings (incl pressure and gas lanterns)                                               | Other manufactured products         | 0.6161267                |
| 22990180               | Woven wire, link mesh or wire spring mattress supports (excl upholstered)                                               | Other manufactured products         | 0.008365488              |
| 22990190               | Cigarette and other lighters                                                                                            | Other manufactured products         | 0.02989696               |
| 22990200               | Fabricated metal products (incl ladders) nec                                                                            | Other manufactured products         | 0.6184664                |
| 22991700               | Other fabricated metal products - commission production (2291-2299)                                                     | Other manufactured products         | 0.5665414                |
| 22991900               | Repairing and servicing (2291-2299)                                                                                     | Services                            | 0.5731241                |
| 23110010               | Finished motor vehicles with less than 10 persons capacity                                                              | Non-medical equipment and machinery | 0.1053226                |
| 23110020               | Finished motor vehicles with 10 or more person capacity                                                                 | Non-medical equipment and machinery | 0.1000435                |
| 23110030               | Finished trucks, truck type vehicles, utilities and panel vans                                                          | Non-medical equipment and machinery | 0.09741458               |
| 23110040               | Unassembled motor vehicles nec                                                                                          | Other manufactured products         | 0.1834242                |
| 23110050               | Chassis with engines for motor vehicles                                                                                 | Other manufactured products         | 0.1583874                |
| 23110060               | Engines nec, for motor vehicles or tractors                                                                             | Other manufactured products         | 0.1039215                |
| 23119000               | Second hand motor vehicles                                                                                              | Non-medical equipment and machinery | 0.4067949                |
| 23120010               | Motor vehicle and truck bodies (coachwork)                                                                              | Other manufactured products         | 0.1184738                |
| 23120020               | Caravans, camper trailers and similar vehicles                                                                          | Non-medical equipment and machinery | 0.1152584                |
| 23120030               | Agricultural self loading and unloading semi-trailers (incl tippers)                                                    | Non-medical equipment and machinery | 0.09669254               |
| 23120040               | Other semi-trailers for the transport of goods & materials (incl tankers, vans, transporters, stock crates & jinkers)   | Non-medical equipment and machinery | 0.09149634               |

| <b>IOPC<br/>(1284)</b> | <b>Sector name</b>                                                                                                    | <b>Aggregated Sector</b>            | <b>Intensity (kg/\$)</b> |
|------------------------|-----------------------------------------------------------------------------------------------------------------------|-------------------------------------|--------------------------|
| 23120050               | Trailers for the transport of goods and materials (incl box trailers, boat trailers and horse floats)                 | Other manufactured products         | 0.09858159               |
| 23120060               | Other trailers & semi-trailers nec (excl for the transport of goods & materials, & domestic type camper trailers)     | Other manufactured products         | 0.09557684               |
| 23120070               | Body panels for trucks and buses                                                                                      | Other manufactured products         | 0.1043867                |
| 23120080               | Parts nec, for motor vehicle trailers and semi-trailers                                                               | Other manufactured products         | 0.1028839                |
| 23130010               | Vehicle electric motors of an output not exceeding 37.5W; other DC motors and DC generators                           | Other manufactured products         | 0.0992105                |
| 23130020               | Motor vehicle and truck air conditioners                                                                              | Other manufactured products         | 0.07865344               |
| 23130030               | Motor vehicle apparatus for making, breaking, protecting & making connections to/in electrical circuits (excl wiring) | Other manufactured products         | 0.1193925                |
| 23130040               | Motor vehicle or motor cycle wiring harnesses                                                                         | Other manufactured products         | 0.09033338               |
| 23130050               | Motor vehicle, tractor or motor cycle starting, heaters, demisters, windscreen wipers; lighting/signalling equipment  | Other manufactured products         | 0.1078382                |
| 23130060               | Motor vehicle, tractor and motor cycle filament lamps and sealed beam lamps                                           | Other manufactured products         | 0.06669434               |
| 23130070               | Motor vehicle & tractor gauges, revolution & production counters, speed indicators, thermostats & similar instruments | Other manufactured products         | 0.09816877               |
| 23130080               | Automotive insulated cable, wire or strip                                                                             | Other manufactured products         | 0.09091364               |
| 23190010               | Motor vehicle transmission assemblies                                                                                 | Other manufactured products         | 0.1364583                |
| 23190020               | Cylinder blocks, pistons, connecting rods, valves                                                                     | Other manufactured products         | 0.1280806                |
| 23190030               | Fuel, lubricating or cooling medium pumps                                                                             | Other manufactured products         | 0.1237155                |
| 23190040               | Cranks, crank & cam shafts, gears and flywheels                                                                       | Other manufactured products         | 0.1204735                |
| 23190050               | Motor vehicle, tractor and truck gaskets                                                                              | Other manufactured products         | 0.1092251                |
| 23190060               | Motor vehicle body panels                                                                                             | Other manufactured products         | 0.1335149                |
| 23190070               | Motor vehicle and tractor parts and equipment nec                                                                     | Other manufactured products         | 0.1017442                |
| 23910010               | Vessels of 50 tonnes gross and over (incl floating structures)                                                        | Non-medical equipment and machinery | 0.4023342                |
| 23920010               | Small boats (incl rowing or sail), yachts and canoes under 5 tonnes displacement (incl inflatable vessels and canoes) | Non-medical equipment and machinery | 0.7671625                |

| <b>IOPC<br/>(1284)</b> | <b>Sector name</b>                                                                                                               | <b>Aggregated Sector</b>            | <b>Intensity (kg/\$)</b> |
|------------------------|----------------------------------------------------------------------------------------------------------------------------------|-------------------------------------|--------------------------|
| 23920020               | Boats and other vessels for pleasure or sport (over 5 but under 50 tonnes)                                                       | Non-medical equipment and machinery | 0.9099886                |
| 23920030               | Cruise ships, ferry and excursion boats, and other vessels under 50 tonnes nec for the transport of persons and goods            | Non-medical equipment and machinery | 0.5847414                |
| 23921700               | Ships and boats - commission production (2391-2392)                                                                              | Non-medical equipment and machinery | 0.4205612                |
| 23921900               | Repairing and servicing (2391-2392)                                                                                              | Services                            | 0.4601688                |
| 23930010               | Locomotives and trams (incl underframes); railway rolling stock                                                                  | Non-medical equipment and machinery | 0.4445272                |
| 23931700               | Railway rolling stock - commission production                                                                                    | Non-medical equipment and machinery | 131.7354                 |
| 23931900               | Repairing and servicing (2393)                                                                                                   | Services                            | 0.4484416                |
| 23940010               | Aircraft and aircraft parts                                                                                                      | Non-medical equipment and machinery | 0.2037545                |
| 23941700               | Aircraft - commission production                                                                                                 | Non-medical equipment and machinery | 0.2027851                |
| 23941900               | Repairing and servicing (2394)                                                                                                   | Services                            | 0.2043646                |
| 23990010               | Motorised tanks and other armoured fighting vehicles and parts                                                                   | Non-medical equipment and machinery | 0.1077021                |
| 23990020               | Transport equipment, parts and accessories nec (incl motorcycles and motor scooters)                                             | Non-medical equipment and machinery | 0.126723                 |
| 23990030               | Repairing and servicing - (incl factory motor vehicle engine repair or replacements) (2311-2319, 2399)                           | Services                            | 0.096677                 |
| 23991700               | Motor vehicles, other transport equipment and parts - commission production (2311-2319, 2399)                                    | Non-medical equipment and machinery | 124.6517                 |
| 24110010               | Cameras, image projectors and parts                                                                                              | Non-medical equipment and machinery | 0.06944521               |
| 24110020               | Photographic goods nec (excl sensitised photographic film, paper, plates & chemicals)                                            | Other manufactured products         | 0.06011051               |
| 24110030               | Objective lenses, filters and other mounted optical elements; microscopes (excl optical) and diffraction apparatus and parts nec | Medical and precision equipment     | 0.07111377               |
| 24110050               | Ophthalmic instruments and appliances                                                                                            | Medical and precision equipment     | 0.07598836               |
| 24110060               | Spectacle and contact lenses                                                                                                     | Other manufactured products         | 0.05665691               |
| 24110070               | Spectacles, sunglasses and frames                                                                                                | Other manufactured products         | 0.06675056               |

| <b>IOPC<br/>(1284)</b> | <b>Sector name</b>                                                                                                                                          | <b>Aggregated Sector</b>            | <b>Intensity (kg/\$)</b> |
|------------------------|-------------------------------------------------------------------------------------------------------------------------------------------------------------|-------------------------------------|--------------------------|
| 24120010               | Surgical, medical equipment (excl X-ray) and appliances (incl artificial joints, limbs or eyes, pacemakers, mechanical dental chairs & needles or syringes) | Medical and precision equipment     | 0.06521459               |
| 24120020               | X-ray medical equipment and parts or accessories                                                                                                            | Medical and precision equipment     | 0.06317947               |
| 24120030               | Hearing aids and parts or accessories                                                                                                                       | Medical and precision equipment     | 0.05861286               |
| 24190010               | Gas or liquid meters (incl parts and accessories)                                                                                                           | Other manufactured products         | 0.05644229               |
| 24190020               | Parking meters, traffic signals and other signalling equipment                                                                                              | Non-medical equipment and machinery | 0.07692804               |
| 24190030               | Taxi meters                                                                                                                                                 | Other manufactured products         | 0.06463128               |
| 24190040               | Watches (incl metal watch straps), watch cases, clocks and parts                                                                                            | Other manufactured products         | 0.06929742               |
| 24190050               | X-ray equipment (excl medical) and parts or accessories                                                                                                     | Non-medical equipment and machinery | 0.1166146                |
| 24190060               | Professional or scientific instruments, apparatus or models for demonstrational purposes only                                                               | Non-medical equipment and machinery | 0.0901919                |
| 24190070               | Surveying, physical or chemical analysis and other measuring, checking and testing instruments, appliances and parts                                        | Medical and precision equipment     | 0.0889051                |
| 24190080               | Radio and radar equipment, navigational aids, and radio remote control equipment                                                                            | Non-medical equipment and machinery | 0.07058817               |
| 24190090               | Optical fibres, fibre bundles and cables (excl insulated)                                                                                                   | Other manufactured products         | 0.05154342               |
| 24190100               | Professional and scientific equipment nec                                                                                                                   | Medical and precision equipment     | 0.1552156                |
| 24191700               | Professional and scientific equipment - commission production (2411-2419)                                                                                   | Medical and precision equipment     | 0.06213372               |
| 24191980               | General government consumption of fixed capital (2411-2419)                                                                                                 | Other                               | 131.7308                 |
| 24210010               | Mainframe and super-computers                                                                                                                               | Non-medical equipment and machinery | 0.05160159               |
| 24210020               | Computer file servers and other multiple-user computer hardware                                                                                             | Non-medical equipment and machinery | 0.06367088               |
| 24210030               | Laptops, notebooks, personal digital assistants and other portable computers                                                                                | Non-medical equipment and machinery | 0.06438775               |
| 24210040               | Desktop computers (PCs)                                                                                                                                     | Non-medical equipment and machinery | 0.06179139               |
| 24210050               | Computer peripheral devices (incl monitors, keyboards, mice, joysticks, speakers, drives and burners)                                                       | Non-medical equipment and machinery | 0.07048894               |

| <b>IOPC<br/>(1284)</b> | <b>Sector name</b>                                                                                                                 | <b>Aggregated Sector</b>            | <b>Intensity (kg/\$)</b> |
|------------------------|------------------------------------------------------------------------------------------------------------------------------------|-------------------------------------|--------------------------|
| 24210060               | Printers and plotters                                                                                                              | Non-medical equipment and machinery | 0.05967873               |
| 24210070               | Other computer hardware, computer peripherals and accessories nec                                                                  | Non-medical equipment and machinery | 0.06171999               |
| 24210080               | Photocopying machines and parts                                                                                                    | Non-medical equipment and machinery | 0.05314334               |
| 24210090               | Electronic machines with a calculating device (incl cash registers, postage-franking & ticket machines) & parts                    | Non-medical equipment and machinery | 0.04564788               |
| 24210100               | Typewriters, word processors, addressing machines, EFTPOS machines, coin counting machines and other office machinery              | Non-medical equipment and machinery | 0.03086286               |
| 24210110               | Money-changing, cigarette, food, beverage and other automatic goods vending machines (excl refrigerated vending machines)          | Non-medical equipment and machinery | 0.06425321               |
| 24210120               | Office machines, parts and accessories nec                                                                                         | Non-medical equipment and machinery | 0.05598639               |
| 24220010               | Line telephone and telegraph equipment (excl headphones and parts)                                                                 | Non-medical equipment and machinery | 0.06899668               |
| 24220020               | Radio and television studio equipment (incl cameras), transmitters, radio transceivers, mobile, cellular & car phones (excl parts) | Non-medical equipment and machinery | 0.06261068               |
| 24220030               | Satellite receivers (excl parts)                                                                                                   | Non-medical equipment and machinery | 0.06128865               |
| 24220040               | Remote monitoring alarm systems                                                                                                    | Non-medical equipment and machinery | 0.06185632               |
| 24220050               | Intercom equipment                                                                                                                 | Non-medical equipment and machinery | 0.04754015               |
| 24220060               | Parts for radio and television studio equipment, transmitters and radio transceivers                                               | Other manufactured products         | 0.06812075               |
| 24220070               | Television antennae parts                                                                                                          | Other manufactured products         | 0.05638372               |
| 24220080               | Telecommunication equipment parts (incl parts for mobile phones and satellite receivers)                                           | Other manufactured products         | 0.06160302               |
| 24290010               | Television receiving sets (excl parts)                                                                                             | Non-medical equipment and machinery | 0.06193638               |
| 24290020               | Radio receiving sets (incl car radios and clock radios) (excl parts)                                                               | Non-medical equipment and machinery | 0.04935142               |
| 24290030               | Sound and video recording and reproducing equipment (incl CD players, record players) (excl parts)                                 | Non-medical equipment and machinery | 0.06116714               |
| 24290040               | Loudspeakers and audio-frequency electric amplifiers (excl hearing aids and parts)                                                 | Non-medical equipment and machinery | 0.06211994               |

| <b>IOPC<br/>(1284)</b> | <b>Sector name</b>                                                                                                                  | <b>Aggregated Sector</b>            | <b>Intensity (kg/\$)</b> |
|------------------------|-------------------------------------------------------------------------------------------------------------------------------------|-------------------------------------|--------------------------|
| 24290050               | Electric or electronic alarm systems (excl remote monitoring alarm systems) and parts                                               | Non-medical equipment and machinery | 0.1604467                |
| 24290060               | Video games, poker machines and other coin or disc operated games                                                                   | Non-medical equipment and machinery | 0.06961936               |
| 24290070               | Prepared unrecorded media for sound or video recording (incl blank CDs, magnetic tapes)                                             | Non-medical equipment and machinery | 0.05240691               |
| 24290080               | Other audio and video equipment and accessories (excl parts)                                                                        | Non-medical equipment and machinery | 0.06091875               |
| 24290090               | Parts for television and radio receiving sets, sound and video recording and reproducing equipment, other audio and video equipment | Other manufactured products         | 0.05708133               |
| 24290100               | Electronic equipment and parts nec                                                                                                  | Non-medical equipment and machinery | 0.06391697               |
| 24291700               | Computer and electronic equipment - commission production (2421-2429)                                                               | Non-medical equipment and machinery | 0.04720252               |
| 24291980               | General government consumption of fixed capital (2421-2429)                                                                         | Other                               | 131.7308                 |
| 24310010               | Uninsulated copper and aluminium stranded wire, ropes, cables, plaited bands and slings                                             | Other manufactured products         | 0.186599                 |
| 24310020               | Co-axial cable and other co-axial electric conductors                                                                               | Other manufactured products         | 0.1744586                |
| 24310040               | Cable (excl co-axial or insulated optical fibre), wire and strip                                                                    | Other manufactured products         | 0.1769488                |
| 24310050               | Insulated optical fibre cable                                                                                                       | Other manufactured products         | 0.1712085                |
| 24320010               | Electric light or lamp bulbs or tubes (incl filament or fluorescent) (excl automotive)                                              | Other manufactured products         | 0.1499124                |
| 24320020               | Incandescent light fittings                                                                                                         | Other manufactured products         | 0.1780888                |
| 24320030               | Cold, discharge, arc, ultra violet, infra-red and other electric lights, torches and fittings nec                                   | Other manufactured products         | 0.1723175                |
| 24320050               | Illuminated signs, name-plates and sign-plates having a permanently fixed light source                                              | Other manufactured products         | 0.1691685                |
| 24390010               | Dry cell batteries                                                                                                                  | Other manufactured products         | 0.1860756                |
| 24390020               | Automotive wet cell batteries                                                                                                       | Other manufactured products         | 0.172131                 |
| 24390030               | Batteries nec and battery components                                                                                                | Other manufactured products         | 0.1743537                |
| 24390050               | Transformers                                                                                                                        | Other manufactured products         | 0.1705954                |
| 24390060               | Electric motors, generators, electric generating sets and rotary converters (incl parts) (excl automotive)                          | Other manufactured products         | 0.1205468                |

| <b>IOPC<br/>(1284)</b> | <b>Sector name</b>                                                                                                   | <b>Aggregated Sector</b>            | <b>Intensity (kg/\$)</b> |
|------------------------|----------------------------------------------------------------------------------------------------------------------|-------------------------------------|--------------------------|
| 24390070               | Electrical welding (incl arc) base metal wire, rods, tubes, plates and electrodes                                    | Other manufactured products         | 0.1778013                |
| 24390090               | Relays and relay sets for radio, telephones and telegraphic equipment                                                | Other manufactured products         | 0.2031956                |
| 24390100               | Electrical apparatus to switch, protect/connect circuits (incl boards & cabinets equipped with such)(excl inductors) | Other manufactured products         | 0.1930427                |
| 24390120               | Inductors (incl chokes, ballasts used with lighting apparatus and current limiting regulators)                       | Other manufactured products         | 0.2158637                |
| 24390130               | Electric soldering and welding (incl arc) irons, guns and other machines, apparatus and parts                        | Non-medical equipment and machinery | 0.173208                 |
| 24390140               | Industrial or laboratory electric furnaces and ovens                                                                 | Non-medical equipment and machinery | 0.1957515                |
| 24390150               | Electric heating resistors (excl carbon)                                                                             | Non-medical equipment and machinery | 0.173761                 |
| 24390160               | Electrical insulators nec and other electrical equipment and parts nec                                               | Non-medical equipment and machinery | 0.1752732                |
| 24391700               | Electrical equipment - commission production (2431-2439)                                                             | Non-medical equipment and machinery | 0.1700037                |
| 24410010               | Solid fuel or gas portable barbecues                                                                                 | Non-medical equipment and machinery | 0.1584485                |
| 24410020               | Domestic stoves, ovens and rangehoods (incl gas, electric, solid fuel, oil or spirit fired)                          | Non-medical equipment and machinery | 0.1321693                |
| 24410030               | Domestic refrigerators and freezers                                                                                  | Non-medical equipment and machinery | 0.1314688                |
| 24410040               | Compressors for domestic refrigeration equipment                                                                     | Other manufactured products         | 0.1300132                |
| 24410050               | Clothes washing machines, drying cabinets, tumble driers and dishwashing machines                                    | Non-medical equipment and machinery | 0.1306328                |
| 24410060               | Domestic food waste disposal units                                                                                   | Non-medical equipment and machinery | 0.1317276                |
| 24490010               | Domestic gas, electric, solid fuel, oil, spirit fired space heaters and non-electric warm air furnaces               | Non-medical equipment and machinery | 0.1302567                |
| 24490020               | Domestic soil heating apparatus                                                                                      | Non-medical equipment and machinery | 0.1337248                |
| 24490030               | Domestic solar hot water collectors, systems and parts (incl systems with conventional backup sources)               | Non-medical equipment and machinery | 0.1287922                |
| 24490040               | Domestic gas and other non-electric water heaters and hot water systems (excl solar) and parts                       | Non-medical equipment and machinery | 0.1328532                |

| <b>IOPC<br/>(1284)</b> | <b>Sector name</b>                                                                                                                                                                        | <b>Aggregated Sector</b>            | <b>Intensity (kg/\$)</b> |
|------------------------|-------------------------------------------------------------------------------------------------------------------------------------------------------------------------------------------|-------------------------------------|--------------------------|
| 24490050               | Domestic electric water heaters or hot water systems and parts                                                                                                                            | Non-medical equipment and machinery | 0.1346934                |
| 24490060               | Domestic room air conditioners and coolers (excl fans)                                                                                                                                    | Non-medical equipment and machinery | 0.1362087                |
| 24490070               | Compressors for domestic air conditioning equipment                                                                                                                                       | Other manufactured products         | 0.126593                 |
| 24490080               | Domestic fans (incl table, floor, wall, window, ceiling or roof)                                                                                                                          | Non-medical equipment and machinery | 0.1277512                |
| 24490090               | Electro-thermic appliances nec                                                                                                                                                            | Non-medical equipment and machinery | 0.1193784                |
| 24490100               | Sewing machines, vacuum cleaners, food mixers and other domestic appliances and parts (nec)                                                                                               | Non-medical equipment and machinery | 0.1355971                |
| 24491700               | Domestic appliances - commission production (2441-2449)                                                                                                                                   | Non-medical equipment and machinery | 0.3692241                |
| 24510010               | Pumps and pumping machinery (incl petrol bowsters and air or gas compressors)                                                                                                             | Non-medical equipment and machinery | 0.1608374                |
| 24510020               | Pump and compressor parts nec                                                                                                                                                             | Other manufactured products         | 0.1769341                |
| 24520010               | Complete air conditioning units nec (incl ducting etc); air conditioning compressors or parts (commercial or industrial)                                                                  | Non-medical equipment and machinery | 0.1536041                |
| 24520030               | Refrigeration cabinets, coolrooms, beverage dispensing equipment (cooling), refrigerated vending machines and refrigeration equipment nec (commercial or industrial) (incl water coolers) | Non-medical equipment and machinery | 0.1586361                |
| 24520050               | Water heaters (commercial or industrial) and parts                                                                                                                                        | Non-medical equipment and machinery | 0.1662548                |
| 24520060               | Space heating equipment (commercial or industrial) (incl parts) nec                                                                                                                       | Non-medical equipment and machinery | 0.158658                 |
| 24610010               | Lawn mowers                                                                                                                                                                               | Non-medical equipment and machinery | 0.16064                  |
| 24610020               | Ploughing, seeding and planting equipment and parts (excl hand tools)                                                                                                                     | Non-medical equipment and machinery | 0.1536115                |
| 24610030               | Harvesting, threshing and haymaking machinery (incl straw or fodder balers or agricultural mowers)                                                                                        | Non-medical equipment and machinery | 0.1528973                |
| 24610040               | Agricultural wheeled tractors (excl crawler)                                                                                                                                              | Non-medical equipment and machinery | 0.1503684                |
| 24610050               | Mechanical appliances and parts for projecting, dispersing or spraying liquids or powders (excl industrial spray guns and steam blasting)                                                 | Non-medical equipment and machinery | 0.05899616               |

| <b>IOPC<br/>(1284)</b> | <b>Sector name</b>                                                                                                                       | <b>Aggregated Sector</b>            | <b>Intensity (kg/\$)</b> |
|------------------------|------------------------------------------------------------------------------------------------------------------------------------------|-------------------------------------|--------------------------|
| 24610070               | Dairy machinery                                                                                                                          | Non-medical equipment and machinery | 0.2114666                |
| 24610080               | Agricultural and horticultural machinery and parts nec                                                                                   | Non-medical equipment and machinery | 0.1551398                |
| 24620010               | Construction and earthmoving wheeled tractors                                                                                            | Non-medical equipment and machinery | 0.1519423                |
| 24620020               | Front end shovel loaders; mechanical shovels, excavators & shovel loaders with a 360 degree revolving superstructure                     | Non-medical equipment and machinery | 0.1625041                |
| 24620030               | Bulldozers & other moving, grading, scraping, excavating, compacting or extracting construction machinery nec                            | Non-medical equipment and machinery | 0.161431                 |
| 24620040               | Buckets, shovels, grabs, grips, blades, bodies and cabs for construction vehicles and other construction and earthmoving machinery parts | Non-medical equipment and machinery | 0.169422                 |
| 24620060               | Machinery for crushing, grinding, mixing or kneading earth, stones, ores or other mineral substances in solid form                       | Non-medical equipment and machinery | 0.1651847                |
| 24620070               | Mineral substances sorting, screening, separating, washing, mixing or kneading machinery and parts                                       | Non-medical equipment and machinery | 0.1590282                |
| 24620080               | Mining or drilling machinery and parts (incl coal or rock cutters, boring, sinking or tunnelling machinery)                              | Non-medical equipment and machinery | 0.1650369                |
| 24630010               | Gas welding and cutting equipment (excl filler welding rods)                                                                             | Non-medical equipment and machinery | 0.1727985                |
| 24630020               | Hand tools, power operated (incl portable electric hand tools) nec                                                                       | Non-medical equipment and machinery | 0.1534335                |
| 24630030               | Machine-tools for working materials other than metal, wood; laser machine tools; hand tools with self-contained motor                    | Non-medical equipment and machinery | 0.1669385                |
| 24630040               | Converters, ingot moulds and ladles, casting machines, metal-rolling mills and rolls and parts                                           | Other manufactured products         | 0.1840805                |
| 24630050               | Machining centres & other wood & metal working machinery & parts nec (excl saw blades, metal moulds & dies)                              | Non-medical equipment and machinery | 0.1635853                |
| 24630060               | Saw blades                                                                                                                               | Other manufactured products         | 0.173886                 |
| 24630070               | Metal dies, die sets and moulds                                                                                                          | Other manufactured products         | 0.1674344                |

| <b>IOPC<br/>(1284)</b> | <b>Sector name</b>                                                                                                                                                                                 | <b>Aggregated Sector</b>            | <b>Intensity (kg/\$)</b> |
|------------------------|----------------------------------------------------------------------------------------------------------------------------------------------------------------------------------------------------|-------------------------------------|--------------------------|
| 24630080               | Interchangeable tools for power-operated hand tools; sintered metal plates; rock drilling and earth boring tools                                                                                   | Non-medical equipment and machinery | 0.1673854                |
| 24630090               | Parts for hand tools with self-contained non-electric motors                                                                                                                                       | Other manufactured products         | 0.1691906                |
| 24630100               | Metal work and tool holders, heads for machine tools, and other machine tool accessories and parts                                                                                                 | Other manufactured products         | 0.1613879                |
| 24690010               | Non-domestic cooking or heating machinery for food or drinks                                                                                                                                       | Non-medical equipment and machinery | 0.141596                 |
| 24690020               | Cream separators; bakery machinery (excl ovens) and other food and beverage processing machinery and parts                                                                                         | Non-medical equipment and machinery | 0.1446283                |
| 24690030               | Distilling/rectifying plant; heat exchange units; centrifuges nec; gas liquefying or beverages filtering machinery                                                                                 | Non-medical equipment and machinery | 0.1659932                |
| 24690040               | Machinery for can and bottle washing, packing, wrapping, canning, bottling and sealing of food and drink                                                                                           | Non-medical equipment and machinery | 0.1691096                |
| 24690050               | Parts of machinery nec for cleaning food or drink cans or bottles, (incl parts of dishwashing machines nec), or for filling, closing, sealing, capsuling or labelling containers for food or drink | Other manufactured products         | 0.1804052                |
| 24690060               | Other food and beverage processing machinery and parts nec                                                                                                                                         | Non-medical equipment and machinery | 0.1883689                |
| 24690070               | Industrial machinery and parts for textile manufacture and treatment industries (excl industrial sewing machines)                                                                                  | Non-medical equipment and machinery | 0.1621112                |
| 24690080               | Office type sheet fed printing machinery, accessories and parts                                                                                                                                    | Other manufactured products         | 0.2376534                |
| 24690090               | Other textile, apparel and leather production machinery and parts nec (incl industrial sewing machines)                                                                                            | Non-medical equipment and machinery | 0.1871885                |
| 24690100               | Printing machinery and parts                                                                                                                                                                       | Non-medical equipment and machinery | 0.1715509                |
| 24690110               | Tobacco machinery and parts; bakery and biscuit ovens; dryers for agricultural products                                                                                                            | Non-medical equipment and machinery | 0.1620364                |
| 24690120               | Machinery and parts for paper or book-binding                                                                                                                                                      | Non-medical equipment and machinery | 0.1662244                |

| <b>IOPC<br/>(1284)</b> | <b>Sector name</b>                                                                                                                       | <b>Aggregated Sector</b>            | <b>Intensity (kg/\$)</b> |
|------------------------|------------------------------------------------------------------------------------------------------------------------------------------|-------------------------------------|--------------------------|
| 24690140               | Special purpose machinery & parts nec                                                                                                    | Non-medical equipment and machinery | 0.1837808                |
| 24691700               | Specialised machinery and equipment - commission production (2461-2469)                                                                  | Non-medical equipment and machinery | 0.1619135                |
| 24910010               | Wheeled tractors (excl crawler, agricultural, construction and earthmoving)                                                              | Non-medical equipment and machinery | 0.1582681                |
| 24910020               | Powered store trucks (incl those used on railway station platforms and forklifts)                                                        | Non-medical equipment and machinery | 0.1725466                |
| 24910030               | Conveyors, continuous-action, for goods & materials                                                                                      | Other manufactured products         | 0.1565677                |
| 24910040               | Hoists, cranes and other lifting, loading or unloading machinery                                                                         | Non-medical equipment and machinery | 0.1630107                |
| 24910050               | Elevators, continuous-action, for goods & materials; escalators & moving walkways                                                        | Non-medical equipment and machinery | 0.1710699                |
| 24910060               | Materials handling equipment and parts nec                                                                                               | Non-medical equipment and machinery | 0.1657365                |
| 24990010               | Hydraulic and pneumatic motors and parts                                                                                                 | Non-medical equipment and machinery | 0.1796806                |
| 24990020               | Rubber, plastics or hot glass working machines (incl parts)                                                                              | Non-medical equipment and machinery | 0.03158607               |
| 24990030               | Non-electric industrial and laboratory furnaces, ovens (other than bakery or biscuit) and incinerators and parts                         | Non-medical equipment and machinery | 0.03532859               |
| 24990040               | Dishwashing machines other than household                                                                                                | Non-medical equipment and machinery | 0.1627845                |
| 24990050               | Engines nec, turbines and water wheels and parts                                                                                         | Non-medical equipment and machinery | 0.1598137                |
| 24990060               | Oil filters, petrol filters and air intake filters for internal combustion engines                                                       | Other manufactured products         | 0.158936                 |
| 24990070               | Bearings (incl parts)                                                                                                                    | Other manufactured products         | 0.1424349                |
| 24990080               | Parts for centrifuges (incl centrifugal dryers); parts for liquid or gas filtering or purifying machinery                                | Other manufactured products         | 0.1568739                |
| 24990100               | Other machinery, equipment and parts nec                                                                                                 | Non-medical equipment and machinery | 0.1715177                |
| 24991700               | Other machinery and equipment - commission production (2451-2452, 2491-2499)                                                             | Non-medical equipment and machinery | 0.1587471                |
| 25110010               | Assembled domestic wooden chairs, upholstered seating with wooden or metal frames, wooden or predominantly wooden domestic furniture nec | Other furniture                     | 0.3303903                |
| 25110020               | Assembled non-domestic wooden or predominantly wooden seating and furniture nec                                                          | Other furniture                     | 0.3336618                |

| <b>IOPC<br/>(1284)</b> | <b>Sector name</b>                                                                                                                                    | <b>Aggregated Sector</b>       | <b>Intensity (kg/\$)</b> |
|------------------------|-------------------------------------------------------------------------------------------------------------------------------------------------------|--------------------------------|--------------------------|
| 25110030               | Unassembled or partly assembled domestic wooden chairs, upholstered seating with wooden or metal frames, wooden or predominantly wooden furniture nec | Other furniture                | 0.3486801                |
| 25110040               | Unassembled or partly assembled non-domestic wooden chairs, furniture and parts nec                                                                   | Other furniture                | 0.3317306                |
| 25110050               | Wooden or predominantly wooden medical, dental, surgical or veterinary furniture                                                                      | Medical and surgical furniture | 0.4058052                |
| 25110060               | Upholstered seats with frames of any material for transport equipment and parts of passenger transport seats                                          | Other manufactured products    | 0.3269687                |
| 25120010               | Cabinets (Audiovisual) - Metal framed                                                                                                                 | Other manufactured products    | 0.3423444                |
| 25120020               | Assembled metal or predominantly metal domestic furniture (excl upholstered seating with metal frames)                                                | Other furniture                | 0.1883887                |
| 25120040               | Metal medical, dental (excl mechanical dental chairs), surgical or veterinary furniture                                                               | Medical and surgical furniture | 0.3255231                |
| 25120080               | Unassembled large scale sheet metal or fabricated metal storage structures and shelving                                                               | Other furniture                | 0.2260834                |
| 25120090               | Unassembled or partly assembled domestic metal furniture and parts nec (excl upholstered seats with metal frames)                                     | Other furniture                | 0.3344973                |
| 25120100               | Unassembled or partly assembled non-domestic metal furniture and parts nec (excl upholstered seats with metal frames)                                 | Other furniture                | 0.3273646                |
| 25120110               | Metal furniture fittings                                                                                                                              | Other furniture                | 0.3214199                |
| 25120120               | Metal seating for entertainment and sporting venues (incl assembled and unassembled)                                                                  | Other furniture                | 0.3363222                |
| 25120130               | Assembled metal non-domestic furniture nec (excl upholstered seating with metal frames)                                                               | Other furniture                | 0.3308435                |
| 25130010               | Mattresses, of, or stuffed with rubber                                                                                                                | Other furniture                | 0.3311575                |
| 25130030               | Water mattresses                                                                                                                                      | Other furniture                | 0.3279796                |
| 25130040               | Mattresses (excl water-mattresses and those of or stuffed with rubber)                                                                                | Other furniture                | 0.01169628               |
| 25130050               | Mattress supports (excl unupholstered woven wire, link mesh, wire springs and those of or stuffed with rubber)                                        | Other furniture                | 0.3334335                |

| <b>IOPC<br/>(1284)</b> | <b>Sector name</b>                                                                                                    | <b>Aggregated Sector</b>       | <b>Intensity (kg/\$)</b> |
|------------------------|-----------------------------------------------------------------------------------------------------------------------|--------------------------------|--------------------------|
| 25190010               | Other assembled domestic furniture nec (excl wooden, metal or plastic)                                                | Other furniture                | 0.3384998                |
| 25190020               | Other medical, dental, surgical or veterinary furniture (excl wooden, metal or plastic) and parts                     | Medical and surgical furniture | 0.3341889                |
| 25190030               | Other assembled non-domestic furniture nec (excl metal, wood and plastic)                                             | Other furniture                | 0.3320486                |
| 25190040               | Unassembled or partly assembled domestic furniture and parts nec (excl metal, wood and plastic)                       | Other furniture                | 0.008180954              |
| 25190050               | Unassembled or partly assembled non-domestic furniture and parts nec (excl metal, wood and plastic)                   | Other furniture                | 0.3242081                |
| 25191700               | Furniture - commission production (2511-2513, 2519)                                                                   | Medical and surgical furniture | 0.422034                 |
| 25910010               | Badges, coins and medals, sheet metal                                                                                 | Other manufactured products    | 0.7222973                |
| 25910020               | Jewellery and silverware                                                                                              | Other manufactured products    | 0.2761623                |
| 25910030               | Imitation jewellery (excl incorporating precious metal except as plating or as minor constituents)(excl watch straps) | Other manufactured products    | 0.2650662                |
| 25920010               | Toys (excl fur or leather)                                                                                            | Other manufactured products    | 0.3147002                |
| 25920020               | Other articles for funfair or table games (incl billiards, snooker or pool, pintables articles and accessories)       | Other manufactured products    | 0.2065911                |
| 25920030               | Sporting equipment and accessories (incl fishing gear and gloves specially designed for use in sport)                 | Other manufactured products    | 0.3507124                |
| 25990010               | Paint brushes or rollers, accessories and parts                                                                       | Other manufactured products    | 0.2215489                |
| 25990020               | Hair brushes, nail brushes, toothbrushes (excl electric) and other brushes for personal use                           | Consumable supplies            | 0.2906924                |
| 25990030               | Advertising signs, name-plates and sign-plates (excl electric and metal)                                              | Other manufactured products    | 0.2880547                |
| 25990040               | Pens, pencils and refills, crayons and chalk                                                                          | Consumable supplies            | 0.3104089                |
| 25990050               | Typewriter ribbons and ink pads                                                                                       | Consumable supplies            | 0.01611857               |
| 25990060               | Umbrellas                                                                                                             | Other manufactured products    | 0.2633205                |
| 25990070               | Musical instruments (incl parts and accessories)                                                                      | Other manufactured products    | 0.3056601                |
| 25990090               | Metal (other than precious) statuettes and other ornaments                                                            | Other manufactured products    | 0.2410537                |

| <b>IOPC<br/>(1284)</b> | <b>Sector name</b>                                                                                                    | <b>Aggregated Sector</b>        | <b>Intensity (kg/\$)</b> |
|------------------------|-----------------------------------------------------------------------------------------------------------------------|---------------------------------|--------------------------|
| 25990100               | Articles of precious metal (incl articles for technical or laboratory use)(excl jewellery)                            | Medical and precision equipment | 0.4524306                |
| 25990120               | Manufacturing nec (incl non-textile based sutures)                                                                    | Consumable supplies             | 0.2138149                |
| 25991700               | Manufacturing products nec - commission production                                                                    | Other manufactured products     | 0.1592134                |
| 26110010               | Electricity generated from fossil fuels                                                                               | Utilities                       | 11.10444                 |
| 26120010               | Hydro-electricity                                                                                                     | Utilities                       | 11.71185                 |
| 26190010               | Electricity generation nec                                                                                            | Utilities                       | 11.86576                 |
| 26400010               | Other electricity service income                                                                                      | Utilities                       | 0.279855                 |
| 26401500               | Margin - Electricity transmission, distribution and on selling (2620-2640)                                            | Utilities                       | 0.2848615                |
| 27001500               | Margin - gas distribution                                                                                             | Utilities                       | 1.176633                 |
| 28100010               | Water, sewerage and drainage services                                                                                 | Utilities                       | 0.4635338                |
| 28101980               | General government consumption of fixed capital (2811, 2812)                                                          | Other                           | 0.4493131                |
| 29000010               | Waste collection (incl skip and portable toilet hire), treatment disposal remediation and materials recovery services | Utilities                       | 0.7876772                |
| 29221980               | General government consumption of fixed capital (2911-2922)                                                           | Other                           | 0.7734796                |
| 30100010               | Residential building construction                                                                                     | Services                        | 0.2865009                |
| 30109010               | Second hand residential buildings                                                                                     | Services                        | 0.3471727                |
| 30200010               | Non-Residential building construction                                                                                 | Services                        | 0.269697                 |
| 30201980               | General government consumption of fixed capital (3020)                                                                | Other                           | 0.2701075                |
| 30209010               | Second hand non-residential buildings                                                                                 | Services                        | 0.3471989                |
| 31010010               | Road and bridge construction (excl repair and maintenance)                                                            | Services                        | 0.2725652                |
| 31010020               | Repair and maintenance - road and bridge                                                                              | Services                        | 0.2499872                |
| 31019010               | Second hand roads and bridges                                                                                         | Services                        | 0.3407955                |
| 31090010               | Non-building construction nec                                                                                         | Services                        | 0.2670519                |
| 31090020               | Repair and maintenance - non-building construction nec                                                                | Services                        | 0.2475901                |
| 31091980               | General government consumption of fixed capital (3101-3109)                                                           | Other                           | 131.7382                 |
| 31099010               | Second hand non-building construction nec                                                                             | Services                        | 0.3580346                |
| 32000010               | Trade services repair and maintenance                                                                                 | Services                        | 0.299288                 |

| <b>IOPC<br/>(1284)</b> | <b>Sector name</b>                                                                                 | <b>Aggregated Sector</b> | <b>Intensity (kg/\$)</b> |
|------------------------|----------------------------------------------------------------------------------------------------|--------------------------|--------------------------|
| 32000020               | Other construction trade services                                                                  | Services                 | 0.3013509                |
| 32001980               | General government consumption of fixed capital (3211-3299)                                        | Other                    | 131.7383                 |
| 37000010               | Non-margin - wholesaling services (excl repairing and servicing)                                   | Services                 | 0.2349939                |
| 37001400               | Margin on reexports - wholesaling services                                                         | Services                 | 0.6438205                |
| 37001500               | Margin - wholesaling services                                                                      | Services                 | 0.2778318                |
| 38000020               | Auction room operations; Electronic procurement brokering services                                 | Services                 | 0.3088349                |
| 38001800               | Wholesale commission on sales                                                                      | Services                 | 0.3228978                |
| 38001980               | General government consumption of fixed capital (3311-3800)                                        | Other                    | 131.7353                 |
| 43000010               | Non-Margin - retailing services (excl repairing and servicing)                                     | Services                 | 0.2604962                |
| 43001500               | Margin - retailing services                                                                        | Services                 | 0.2890396                |
| 43001800               | Retail commission on sales                                                                         | Services                 | 0.26642                  |
| 43001980               | General government consumption of fixed capital (3911-4320)                                        | Other                    | 131.7354                 |
| 44000010               | Accommodation services                                                                             | Services                 | 0.7757772                |
| 45000010               | Meal preparation and presentation                                                                  | Services                 | 0.8051789                |
| 45000020               | Beverage serving service                                                                           | Services                 | 0.7180186                |
| 45000030               | Takeaway food                                                                                      | Services                 | 0.8937478                |
| 45000040               | Catering services                                                                                  | Services                 | 0.7597278                |
| 45000050               | Net losses from gambling - Clubs, pubs, taverns and bars (Hospitality)                             | Services                 | 0.7031039                |
| 45001500               | Margin - food and beverage services (4511-4530)                                                    | Services                 | 0.702557                 |
| 46100020               | Non-margin - road freight transport services (incl rental or hire of trucks with driver)           | Services                 | 0.4946476                |
| 46100030               | Road vehicle towing services                                                                       | Services                 | 0.501755                 |
| 46101600               | Margin - road freight transport services                                                           | Services                 | 0.6336855                |
| 46210010               | Interurban or non-metropolitan bus transport services (incl long distance, charter and rural)      | Services                 | 0.6290609                |
| 46220010               | Urban or metropolitan bus and tramway transport services (incl short distance, airport and school) | Services                 | 0.5899691                |
| 46230010               | Taxi transport services                                                                            | Services                 | 0.6331808                |
| 46230020               | Rental or hire of passenger car with driver                                                        | Services                 | 0.5473284                |

| <b>IOPC<br/>(1284)</b> | <b>Sector name</b>                                                                | <b>Aggregated Sector</b> | <b>Intensity (kg/\$)</b> |
|------------------------|-----------------------------------------------------------------------------------|--------------------------|--------------------------|
| 46230030               | Rental or hire of passenger road vehicle nec (incl buses and coaches) with driver | Services                 | 0.5489261                |
| 46230040               | Urban road passenger transport services nec                                       | Services                 | 1.736808                 |
| 46230050               | Interurban road passenger transport services nec                                  | Services                 | 1.171245                 |
| 47100020               | Non-margin - railway freight transport services nec                               | Services                 | 0.4549492                |
| 47101600               | Margin - railway freight transport services                                       | Services                 | 2.574826                 |
| 47200010               | Urban railway (incl monorail) passenger transport services                        | Services                 | 0.7111859                |
| 47200020               | Interurban railway passenger transport services                                   | Services                 | 0.7566106                |
| 48100020               | Non-margin - ocean and inland water freight transport services                    | Services                 | 1.018922                 |
| 48101600               | Margin - ocean and inland water freight transport services                        | Services                 | 1.027654                 |
| 48200010               | Local water transport services for passengers                                     | Services                 | 0.7524738                |
| 48200020               | Long distance water transport services for passengers                             | Services                 | 0.6482546                |
| 48200030               | Rental or hire of water vessel with operator                                      | Services                 | 0.6329423                |
| 49000020               | Non-margin - air and space freight transport services                             | Services                 | 0.4108922                |
| 49000030               | Air passenger transport services                                                  | Services                 | 0.5451511                |
| 49000040               | Rental or hire of aircraft with operator                                          | Services                 | 0.3834105                |
| 49001600               | Margin - air and space freight transport services                                 | Services                 | 0.4232153                |
| 50100010               | Scenic and sightseeing transport services                                         | Services                 | 0.9685037                |
| 50211600               | Margin - pipeline transport services                                              | Services                 | 0.6066253                |
| 50290010               | Transport services nec (incl ski lift operation)                                  | Services                 | 0.5443666                |
| 50291980               | General government consumption of fixed capital (5010-5029)                       | Other                    | 122.9449                 |
| 51010010               | Postal services                                                                   | Services                 | 1.70411                  |
| 51020010               | Courier pick-up and delivery services                                             | Services                 | 1.274308                 |
| 51021980               | General government consumption of fixed capital (5101-5102)                       | Other                    | 122.9388                 |
| 52100030               | Non-margin - stevedoring and port handling services (5211-5219)                   | Services                 | 0.2146658                |
| 52100040               | Support services to water transport nec (5211-5219)                               | Services                 | 0.2126557                |
| 52101400               | Margin on reexports - services to water transport (5211-5219)                     | Services                 | 0.2322024                |

| <b>IOPC<br/>(1284)</b> | <b>Sector name</b>                                                                                                           | <b>Aggregated Sector</b> | <b>Intensity (kg/\$)</b> |
|------------------------|------------------------------------------------------------------------------------------------------------------------------|--------------------------|--------------------------|
| 52101600               | Margin - services to water transport (5211-5219)                                                                             | Services                 | 0.282701                 |
| 52200010               | Airport operations and other air transport support services nec                                                              | Services                 | 0.2093892                |
| 52910010               | Customs agency services                                                                                                      | Services                 | 0.1829551                |
| 52920010               | Freight forwarding agency services                                                                                           | Services                 | 0.186133                 |
| 52990010               | Other transport support services nec                                                                                         | Services                 | 0.185665                 |
| 52990020               | Support services for road transport nec (incl taxi radio base and road vehicle driving service)                              | Services                 | 0.1967543                |
| 52990030               | Support services for railway transport nec (incl station and terminal operations)                                            | Services                 | 0.1979814                |
| 52991980               | General government consumption of fixed capital (5211-5299)                                                                  | Other                    | 0.1852453                |
| 53010010               | Grain storage services                                                                                                       | Services                 | 0.188871                 |
| 53090010               | Warehousing and storage services nec                                                                                         | Services                 | 0.1922589                |
| 53091980               | General government consumption of fixed capital (5301-5309)                                                                  | Other                    | 0.1862813                |
| 54110010               | Newspaper publishing (incl printed and published by the same business) published once a week or more                         | Services                 | 0.1728359                |
| 54110020               | Newspaper publishing (incl printed and published by the same business) published less than weekly                            | Services                 | 0.1545854                |
| 54110030               | Newspapers - advertising services                                                                                            | Services                 | 0.1386433                |
| 54110040               | Copyright leasing - newspapers                                                                                               | Services                 | 0.1777725                |
| 54120010               | Magazine and other periodical publishing (incl printed and published by the same business)                                   | Services                 | 0.2046676                |
| 54120030               | Magazines and other periodicals - advertising services                                                                       | Services                 | 0.1410081                |
| 54120040               | Copyright leasing - magazines and other periodicals                                                                          | Services                 | 0.1857111                |
| 54130010               | Book publishing (incl textbooks, encyclopedias, travel guides and atlases) (incl printed and published by the same business) | Services                 | 0.2133875                |
| 54130030               | Books - advertising services                                                                                                 | Services                 | 0.1343865                |
| 54130040               | Copyright leasing - books                                                                                                    | Services                 | 0.1835912                |
| 54140010               | Directory, mailing list, collection or compilation publishing (incl printed and published by the same business)              | Services                 | 0.259078                 |

| <b>IOPC<br/>(1284)</b> | <b>Sector name</b>                                                                                                          | <b>Aggregated Sector</b> | <b>Intensity (kg/\$)</b> |
|------------------------|-----------------------------------------------------------------------------------------------------------------------------|--------------------------|--------------------------|
| 54140030               | Directory, mailing list, collection or compilation - advertising services                                                   | Services                 | 0.1460118                |
| 54190010               | Other publishing nec (incl maps, greeting cards, postcards and calendars) (incl printed and published by the same business) | Services                 | 0.1913923                |
| 54190030               | Other publishing - advertising services                                                                                     | Services                 | 0.144792                 |
| 54190040               | Copyright leasing - other                                                                                                   | Services                 | 0.3196126                |
| 54200010               | Software publishing services (non-customised)                                                                               | Services                 | 0.1643713                |
| 54200020               | Copyright leasing - software (non-customised)                                                                               | Services                 | 0.1732045                |
| 54201980               | General government consumption of fixed capital (5411-5420)                                                                 | Other                    | 0.1479464                |
| 55110010               | Motion picture and video production                                                                                         | Services                 | 0.1994239                |
| 55120010               | Motion picture and video distribution services                                                                              | Services                 | 0.198962                 |
| 55120020               | Copyright leasing - motion pictures and videos                                                                              | Services                 | 0.1997035                |
| 55130010               | Motion picture theatre services                                                                                             | Services                 | 0.2317761                |
| 55140010               | Post-production services and other motion picture and video activities                                                      | Services                 | 0.2413199                |
| 55210010               | Music publishing nec (incl sheet music)                                                                                     | Services                 | 0.2304221                |
| 55210030               | Music copyrights (Acquiring, registering and selling)                                                                       | Services                 | 0.2416744                |
| 55220010               | Music and other sound recording studios operation (incl pre-recorded radio programming services)                            | Services                 | 0.2527681                |
| 55221980               | General government consumption of fixed capital (5511-5522)                                                                 | Other                    | 0.1994338                |
| 56100010               | Radio broadcasting services                                                                                                 | Services                 | 0.1890683                |
| 56210010               | Free-to-air television broadcasting services                                                                                | Services                 | 0.1740487                |
| 56220010               | Cable (Pay TV) and other subscription broadcasting services                                                                 | Services                 | 0.180292                 |
| 56221980               | General government consumption of fixed capital (5610-5622)                                                                 | Other                    | 0.1720571                |
| 57000010               | Internet publishing and broadcasting services (incl radio, television, books, newspapers and magazines)                     | Services                 | 0.08646411               |
| 57000020               | Internet publishing - advertising services                                                                                  | Services                 | 0.08424482               |
| 57001980               | General government consumption of fixed capital (5700)                                                                      | Other                    | 122.9502                 |

| <b>IOPC<br/>(1284)</b> | <b>Sector name</b>                                                                                                      | <b>Aggregated Sector</b> | <b>Intensity (kg/\$)</b> |
|------------------------|-------------------------------------------------------------------------------------------------------------------------|--------------------------|--------------------------|
| 58010020               | Wired telecommunications network services (incl International, long distance and local)                                 | Services                 | 0.301601                 |
| 58020010               | Mobile and other telecommunication network services nec (incl wireless and satellite)                                   | Services                 | 0.3040778                |
| 58090010               | Other telecommunications services nec                                                                                   | Services                 | 0.3192903                |
| 58091980               | General government consumption of fixed capital (5801-5809)                                                             | Other                    | 122.997                  |
| 59100010               | Internet access (incl ISPs) and internet search services                                                                | Services                 | 0.0920035                |
| 59210020               | Data processing and web hosting services                                                                                | Services                 | 0.1001966                |
| 59220010               | Information storage and retrieval services                                                                              | Services                 | 0.0989796                |
| 59221980               | General government consumption of fixed capital (5910-5922)                                                             | Other                    | 122.9502                 |
| 60100010               | Library and archive services                                                                                            | Services                 | 0.06833852               |
| 60200010               | Other information services (incl radio and television new collection and telephone based recorded information services) | Services                 | 0.1285567                |
| 60201980               | General government consumption of fixed capital (6010-6020)                                                             | Other                    | 0.05885996               |
| 62000010               | Bank services - Financial intermediation services indirectly measured                                                   | Services                 | 0.05238305               |
| 62000020               | Bank services nec                                                                                                       | Services                 | 0.05489969               |
| 62220020               | Building society services nec                                                                                           | Services                 | 0.05524855               |
| 62230020               | Credit union services nec                                                                                               | Services                 | 0.05192867               |
| 62290010               | Other depository financial services (incl securitiser services) - Financial intermediation services indirectly measured | Services                 | 0.05084292               |
| 62290030               | Other depository financial services nec (incl money market and securitiser services)                                    | Services                 | 0.0504161                |
| 62300010               | Non-depository finance services - Financial intermediation services indirectly measured                                 | Services                 | 0.05007433               |
| 62300020               | Non-depository finance services nec                                                                                     | Services                 | 0.0788534                |
| 62400010               | Financial asset investors                                                                                               | Services                 | 0.05041781               |
| 63100010               | Life insurance provision                                                                                                | Services                 | 0.1204979                |
| 63210010               | Health insurance provision                                                                                              | Services                 | 0.120459                 |
| 63220010               | Fire and industrial special risks insurance provision                                                                   | Services                 | 0.1246344                |

| <b>IOPC<br/>(1284)</b> | <b>Sector name</b>                                                                                        | <b>Aggregated Sector</b> | <b>Intensity (kg/\$)</b> |
|------------------------|-----------------------------------------------------------------------------------------------------------|--------------------------|--------------------------|
| 63220020               | Houseowner and household insurance provision                                                              | Services                 | 0.1206426                |
| 63220030               | Motor vehicle comprehensive and compulsory third party insurance provision                                | Services                 | 0.118255                 |
| 63220040               | Public liability, product liability and professional indemnity insurance provision                        | Services                 | 0.1119603                |
| 63220060               | Marine insurance provision (Non-margin); aviation hull/cargo insurance provision                          | Services                 | 0.1678034                |
| 63220070               | Employers liability insurance provision                                                                   | Services                 | 0.3207901                |
| 63220080               | Insurance provision (incl travel insurance) nec.                                                          | Services                 | 0.1148744                |
| 63221500               | Marine insurance provision (Margin)                                                                       | Services                 | 0.3016036                |
| 63300010               | Superannuation fund services                                                                              | Services                 | 0.1206748                |
| 63301980               | General government consumption of fixed capital (6310-6330)                                               | Other                    | 122.9979                 |
| 64110010               | Financial asset broking services                                                                          | Services                 | 0.1156733                |
| 64190010               | Insurance fund management service                                                                         | Services                 | 0.1090461                |
| 64190020               | Auxiliary services to finance and investment nec                                                          | Services                 | 0.1113381                |
| 64200010               | Services to insurance nec                                                                                 | Services                 | 0.1126736                |
| 66110010               | Passenger car rental or hire (incl cars, minibuses) - (excl financial leases)                             | Services                 | 0.5286387                |
| 66190010               | Other motor vehicle rental or hire (incl caravan & trailer) (excl financial leases) nec                   | Services                 | 0.3016652                |
| 66190020               | Transport equipment rental or hire (incl ship & boat) nec                                                 | Services                 | 0.3120051                |
| 66200010               | Farm animal and bloodstock leasing                                                                        | Services                 | 131.3804                 |
| 66310010               | Heavy machinery and Scaffolding (excl erection) rental or hire (excl financial leases)                    | Services                 | 0.2781562                |
| 66320010               | Video and other electronic media rental or hire                                                           | Services                 | 0.3084361                |
| 66390010               | Other goods and equipment rental hire nec (incl art works, household goods and office machinery)          | Services                 | 0.2806153                |
| 66400010               | Non-financial intangible assets (excl copyrights) leasing                                                 | Services                 | 0.2916998                |
| 66401980               | General government consumption of fixed capital (6611-6640)                                               | Other                    | 131.7409                 |
| 67110010               | Ownership of dwellings                                                                                    | Services                 | 0.07456128               |
| 67110020               | Residential caravan park operation and residential property body corporate or strata corporation services | Services                 | 0.07343449               |

| <b>IOPC<br/>(1284)</b> | <b>Sector name</b>                                                                                                       | <b>Aggregated Sector</b> | <b>Intensity (kg/\$)</b> |
|------------------------|--------------------------------------------------------------------------------------------------------------------------|--------------------------|--------------------------|
| 67111980               | General government consumption of fixed capital (6711)                                                                   | Other                    | 0.1445212                |
| 67120010               | Non-residential property operator services (incl non-residential property body corporate or strata corporation services) | Services                 | 0.1681234                |
| 67200010               | Real estate agent services                                                                                               | Services                 | 0.1659544                |
| 67200020               | Agricultural or pastoral property broking, leasing, renting or valuing                                                   | Services                 | 0.1667639                |
| 67201980               | General government consumption of fixed capital (6712-6720)                                                              | Other                    | 131.7382                 |
| 69000020               | Architectural services                                                                                                   | Services                 | 0.1400199                |
| 69000030               | Surveying and mapping services                                                                                           | Services                 | 0.1411885                |
| 69000040               | Quantity surveying services                                                                                              | Services                 | 0.1407761                |
| 69000050               | Engineering design and consulting services                                                                               | Services                 | 0.1420864                |
| 69000060               | Commercial art and display services                                                                                      | Services                 | 0.1406477                |
| 69000070               | Specialised design services nec (incl fashion, interior and jewellery design)                                            | Services                 | 0.1475477                |
| 69000080               | Scientific testing and analysis services                                                                                 | Services                 | 0.1449104                |
| 69000090               | Legal services                                                                                                           | Services                 | 0.1453405                |
| 69000100               | Accounting services                                                                                                      | Services                 | 0.1488046                |
| 69000110               | Advertising services                                                                                                     | Services                 | 0.1413023                |
| 69000120               | Market research services                                                                                                 | Services                 | 0.1410389                |
| 69000130               | Statistical services                                                                                                     | Services                 | 0.1401274                |
| 69000140               | Corporate head office management                                                                                         | Services                 | 0.1407902                |
| 69000150               | Management services (incl business, artists, entertainers and sporting professionals)                                    | Services                 | 0.1833092                |
| 69000160               | Management advice and consulting services nec (excl financial and computer consulting)                                   | Services                 | 0.1436987                |
| 69000170               | Veterinary services                                                                                                      | Services                 | 0.1442516                |
| 69000180               | Photography services nec (incl Video filming of Weddings etc)                                                            | Services                 | 0.1435543                |
| 69000190               | Meteorology services                                                                                                     | Services                 | 0.1443386                |
| 69000200               | Interpreting and translating services                                                                                    | Services                 | 0.1485771                |
| 69000210               | Research and development services                                                                                        | Services                 | 0.1533312                |
| 69000220               | Own account research and development                                                                                     | Services                 | 0.1409529                |
| 69000230               | Professional, scientific or technical services nec                                                                       | Services                 | 0.1432064                |

| <b>IOPC<br/>(1284)</b> | <b>Sector name</b>                                                                                                           | <b>Aggregated Sector</b> | <b>Intensity (kg/\$)</b> |
|------------------------|------------------------------------------------------------------------------------------------------------------------------|--------------------------|--------------------------|
| 69001980               | General government consumption of fixed capital (6910, 6921-6950, 6961-6999)                                                 | Other                    | 0.14042                  |
| 70000010               | Computer systems, hardware and software design and development services                                                      | Services                 | 0.1086178                |
| 70000030               | Computer support services                                                                                                    | Services                 | 0.1086462                |
| 70001980               | General government consumption of fixed capital (7000)                                                                       | Other                    | 0.1034368                |
| 72110010               | Employment placement and recruitment services (incl casting agency service)                                                  | Services                 | 0.1041927                |
| 72120010               | Labour supply services                                                                                                       | Services                 | 0.1060685                |
| 72200010               | Travel agency and tour arrangement services                                                                                  | Services                 | 0.1148193                |
| 72910010               | Periodical subscription service                                                                                              | Services                 | 0.1212103                |
| 72910020               | Office administration services nec (incl clerical, billing, record-keeping and payroll services)                             | Services                 | 0.1091538                |
| 72920010               | Document preparation services nec (incl word processing, stenography, typing, transcription and resume writing)              | Services                 | 0.1310565                |
| 72930010               | Credit rating, credit investigation and collection agency services                                                           | Services                 | 0.1054026                |
| 72940010               | Call centre operation                                                                                                        | Services                 | 0.1676536                |
| 72990010               | Tourist information centre operation                                                                                         | Services                 | 0.1074526                |
| 72990020               | Theatre, concert and sport ticketing and booking services                                                                    | Services                 | 0.1095814                |
| 72990030               | Event management or promotion (incl sport, art or similar); fund raising services (fee based) or administration services nec | Services                 | 0.1252502                |
| 72991980               | General government consumption of fixed capital (7211-7299)                                                                  | Other                    | 0.1072812                |
| 73110010               | Building and other industrial cleaning services nec (incl gutters, drains, roads, beaches, swimming pools and toilets)       | Services                 | 0.1060595                |
| 73120010               | Pest control services                                                                                                        | Services                 | 0.1090343                |
| 73130010               | Gardening services                                                                                                           | Services                 | 0.1082895                |
| 73200010               | Crating or packing services for transport                                                                                    | Services                 | 0.1037596                |
| 73200020               | Packaging of fresh produce, groceries; bottling or rebottling services and packaging services nec                            | Services                 | 0.1071489                |

| <b>IOPC<br/>(1284)</b> | <b>Sector name</b>                                                             | <b>Aggregated Sector</b> | <b>Intensity (kg/\$)</b> |
|------------------------|--------------------------------------------------------------------------------|--------------------------|--------------------------|
| 73201980               | General government consumption of fixed capital (7311-7320)                    | Other                    | 131.7354                 |
| 75000010               | Government administration and regulatory services                              | Other                    | 0.3142759                |
| 75400010               | Judicial services                                                              | Services                 | 0.3135832                |
| 75510010               | Domestic government diplomatic and consular services                           | Other                    | 0.3179826                |
| 75521980               | General government consumption of fixed capital (7510-7552)                    | Other                    | 0.313333                 |
| 76000010               | Defence services                                                               | Services                 | 0.1397085                |
| 76001980               | General government consumption of fixed capital (7600)                         | Other                    | 0.1394573                |
| 77110010               | Police services                                                                | Services                 | 0.1140756                |
| 77120010               | Investigative and security services (incl locksmiths) (excl police)            | Services                 | 0.1126576                |
| 77130010               | Fire brigade services (incl forest fire fighting)                              | Services                 | 0.1110733                |
| 77140010               | Correctional and detention centres (incl juvenile)                             | Services                 | 0.1108484                |
| 77190010               | Public order and safety services (incl coastwatch and country border) nec      | Services                 | 0.1145493                |
| 77201980               | General government consumption of fixed capital (7711-7720)                    | Other                    | 0.1110574                |
| 80100010               | Preschool education services                                                   | Services                 | 0.1061411                |
| 80200010               | Primary education services                                                     | Services                 | 0.1043588                |
| 80200020               | Secondary education services                                                   | Services                 | 0.1050793                |
| 80200030               | Special school education services                                              | Services                 | 0.1038904                |
| 81010010               | Technical, vocational and other non-tertiary education services                | Services                 | 0.1357763                |
| 81020010               | Tertiary higher education services (incl undergraduate and postgraduate)       | Services                 | 0.1508269                |
| 82110010               | Sports or physical recreation instruction services (incl ski or snowboard) nec | Services                 | 0.102655                 |
| 82120010               | Arts education services (excl vocational)                                      | Services                 | 0.1013588                |
| 82190010               | NPISH-provided adult, community and other education services                   | Services                 | 0.3020907                |
| 82190020               | Other adult, community and other education services                            | Services                 | 0.12139                  |
| 82200010               | Educational support services                                                   | Services                 | 0.1083446                |

| <b>IOPC<br/>(1284)</b> | <b>Sector name</b>                                                                                              | <b>Aggregated Sector</b> | <b>Intensity (kg/\$)</b> |
|------------------------|-----------------------------------------------------------------------------------------------------------------|--------------------------|--------------------------|
| 82201980               | General government consumption of fixed capital (8010-8220)                                                     | Other                    | 0.1045349                |
| 84010010               | Hospital services (except Psychiatric Hospitals)                                                                | Services                 | 0.1262533                |
| 84020010               | Psychiatric Hospitals services                                                                                  | Services                 | 0.1262006                |
| 85110010               | General practice medical services                                                                               | Services                 | 0.1258666                |
| 85120010               | Specialist medical services                                                                                     | Services                 | 0.1251147                |
| 85200010               | Pathology and Diagnostic Imaging services                                                                       | Services                 | 0.1260949                |
| 85310010               | Dental services                                                                                                 | Services                 | 0.1246277                |
| 85320010               | Optometry and optical dispensing                                                                                | Services                 | 0.124658                 |
| 85330010               | Physiotherapy services                                                                                          | Services                 | 0.124594                 |
| 85340010               | Chiropractic and Osteopathic Services                                                                           | Services                 | 0.1236748                |
| 85390010               | NPISH-provided other allied health services                                                                     | Services                 | 0.515165                 |
| 85390020               | Other allied health services n.e.c.                                                                             | Services                 | 0.1251927                |
| 85910010               | Ambulance services                                                                                              | Services                 | 0.1257522                |
| 85990010               | Other health services nec                                                                                       | Services                 | 0.1232873                |
| 85991980               | General government consumption of fixed capital (8401 - 8599)                                                   | Other                    | 0.127529                 |
| 86010010               | Residential care services for the elderly (Aged care)                                                           | Services                 | 0.1030823                |
| 86010020               | Residential care services for the disabled                                                                      | Services                 | 0.1019821                |
| 86090010               | Other residential care services (incl mental health illnesses or substance abuse) nec                           | Services                 | 0.1019573                |
| 87100010               | Child care services                                                                                             | Services                 | 0.1034273                |
| 87900010               | NPISH-provided other social assistance services n.e.c. (incl elderly, disabled, marriage and adoption services) | Services                 | 0.5336632                |
| 87900020               | Other social assistance services n.e.c. (incl elderly, disabled, marriage and adoption services)                | Services                 | 0.1033187                |
| 87901980               | General government consumption of fixed capital (8601 - 8790)                                                   | Other                    | 0.1040298                |
| 89100010               | Museum and art gallery services                                                                                 | Services                 | 0.1341729                |
| 89210010               | Zoological and botanical services                                                                               | Services                 | 0.1341531                |
| 89220010               | Nature reserve and conservation park services                                                                   | Services                 | 0.1305035                |
| 89221980               | General government consumption of fixed capital (8910-8922)                                                     | Other                    | 0.124885                 |
| 90010010               | Performing arts operation nec (incl theatre restaurants and circuses)                                           | Services                 | 0.134499                 |

| <b>IOPC<br/>(1284)</b> | <b>Sector name</b>                                                                                 | <b>Aggregated Sector</b> | <b>Intensity (kg/\$)</b> |
|------------------------|----------------------------------------------------------------------------------------------------|--------------------------|--------------------------|
| 90020010               | Services of independent creative artists, writers and performers                                   | Services                 | 0.1235888                |
| 90020020               | Theatre lighting, costume design and set design services                                           | Services                 | 0.1223344                |
| 90030010               | Performing arts venue operation                                                                    | Services                 | 0.1457943                |
| 90031980               | General government consumption of fixed capital (9001-9003)                                        | Other                    | 0.1258909                |
| 91110010               | Gymnasia or fitness centre operation                                                               | Services                 | 0.1326587                |
| 91120010               | Sports professional services                                                                       | Services                 | 0.1267641                |
| 91120020               | NPISH-provided sport and physical recreation club operation                                        | Services                 | 0.3305276                |
| 91120030               | Other sport and physical recreation club operation                                                 | Services                 | 0.1315221                |
| 91130010               | Sports grounds and similar recreational facilities operation nec (excl Gymnasia or fitness centre) | Services                 | 0.1291157                |
| 91140010               | NPISH-provided sport and physical recreation administrative services                               | Services                 | 0.3386664                |
| 91140020               | Other sport and physical recreation administrative services                                        | Services                 | 0.1295932                |
| 91210010               | Horse and dog racing, administration and track operation                                           | Services                 | 0.1256471                |
| 91290010               | racing horse or dog training and stable (kennel) operation                                         | Services                 | 0.1336525                |
| 91310010               | Amusement parks and centres operation                                                              | Services                 | 0.1366411                |
| 91390010               | Amusement and other recreational activities nec                                                    | Services                 | 0.1479572                |
| 91391980               | General government consumption of fixed capital (9111-9139)                                        | Other                    | 0.128223                 |
| 92010010               | Casinos operation                                                                                  | Services                 | 0.1288817                |
| 92020010               | Lottery operation                                                                                  | Services                 | 0.1333157                |
| 92090010               | Totalisator agency services                                                                        | Services                 | 0.1281147                |
| 92090020               | Gambling services nec                                                                              | Services                 | 0.1338869                |
| 92091980               | General government consumption of fixed capital (9201-9209)                                        | Other                    | 132.7667                 |
| 94110010               | Automotive electrical repair or replacement services                                               | Services                 | 0.1458281                |
| 94110020               | Automotive electrical installation services                                                        | Services                 | 0.1470905                |
| 94120010               | Car wash and cleaning services                                                                     | Services                 | 0.1481611                |
| 94120020               | Automotive body, paint and interior repair services                                                | Services                 | 0.152863                 |

| <b>IOPC<br/>(1284)</b> | <b>Sector name</b>                                                                     | <b>Aggregated Sector</b> | <b>Intensity (kg/\$)</b> |
|------------------------|----------------------------------------------------------------------------------------|--------------------------|--------------------------|
| 94190010               | Other automotive repair services                                                       | Services                 | 0.1463319                |
| 94191980               | General government consumption of fixed capital (9411-9419)                            | Other                    | 131.7353                 |
| 94210010               | Domestic appliance repair and maintenance                                              | Services                 | 0.1265389                |
| 94220010               | Electronic and precision equipment repair and maintenance (excl domestic appliance)    | Services                 | 0.1240848                |
| 94290010               | Other machinery and equipment repair and maintenance                                   | Services                 | 0.1245155                |
| 94910010               | Clothing and footwear repair                                                           | Services                 | 0.1317865                |
| 94990010               | Other repair and maintenance nec                                                       | Services                 | 0.1258155                |
| 94991980               | General government consumption of fixed capital (9421-9499)                            | Other                    | 131.7353                 |
| 95110010               | Hairdressing and beauty services (incl massage services nec)                           | Services                 | 0.2376698                |
| 95200010               | Funeral directing services                                                             | Services                 | 0.2334064                |
| 95200020               | Crematoria and cemetery services                                                       | Services                 | 0.2051987                |
| 95300010               | Personal services nec (incl weight reduction centres and prostitution services)        | Services                 | 0.2331309                |
| 95310010               | Laundry and dry-cleaning services                                                      | Services                 | 0.2191892                |
| 95320010               | Photographic film processing                                                           | Services                 | 0.2141073                |
| 95330010               | Parking services                                                                       | Services                 | 0.2316813                |
| 95391980               | General government consumption of fixed capital (9511-9539)                            | Other                    | 0.2062064                |
| 95400010               | Religious services                                                                     | Services                 | 0.09896035               |
| 95510010               | Business and professional association services                                         | Services                 | 0.1052575                |
| 95520010               | Labour association services                                                            | Services                 | 0.1025439                |
| 95590010               | Interest groups nec (incl welfare fundraising services)                                | Services                 | 0.1035715                |
| 95590020               | Services to students at post-secondary institutions by their sports and student unions | Services                 | 0.1034714                |
| 95591980               | General government consumption of fixed capital (9540-9559)                            | Other                    | 131.322                  |
| 96000010               | Domestic services of private household employees                                       | Services                 | 0.2415544                |
